1 **High frequency neuronal bursting is essential for circadian and sleep behaviors in *Drosophila***

2

3 Florencia Fernandez-Chiappe<sup>1¶</sup>, Lia Frenkel<sup>2,3¶</sup>, Carina Celeste Colque<sup>2</sup>, Ana Ricciuti<sup>1</sup>, Bryan Hahm<sup>1</sup>,  
4 Karina Cerredo<sup>1</sup>, Nara Inés Muraro<sup>1,2\*</sup> and María Fernanda Ceriani<sup>2\*</sup>

5

6 <sup>1</sup> Current address: Instituto de Investigación en Biomedicina de Buenos Aires (IBioBA) - CONICET -  
7 Partner Institute of the Max Planck Society, Buenos Aires, Argentina.

8 <sup>2</sup> Fundación Instituto Leloir - IIBBA - CONICET, Buenos Aires, Argentina.

9 <sup>3</sup> Instituto de Biociencias, Biotecnologías y Biomedicina (IB3) - Departamento de Fisiología Biología  
10 Molecular y Celular - Facultad de Ciencias Exactas y Naturales - Universidad de Buenos Aires,  
11 Buenos Aires, Argentina.

12

13 <sup>¶</sup> These authors contributed equally to this work.

14 \* Shared corresponding authors.

15

16 Correspondence: nmuraro@ibioba-mpsp-conicet.gov.ar, fceriani@leloir.org.ar

17

18 **Short Title:** I<sub>h</sub> channel in fly circadian and sleep behaviors

## 19 **Abstract**

20 Circadian rhythms have been extensively studied in *Drosophila*, however, still little is  
21 known about how the electrical properties of clock neurons are specified. We have performed a  
22 behavioral genetic screen through the downregulation of candidate ion channels in the lateral  
23 ventral neurons (LNvs) and show that the hyperpolarization-activated cation current  $I_h$  is  
24 important for the behaviors that the LNvs command: temporal organization of locomotor activity  
25 and sleep. Using whole-cell patch clamp electrophysiology we demonstrate that small LNvs are  
26 bursting neurons, and that  $I_h$  is necessary to achieve the high frequency bursting firing pattern  
27 characteristic of both types of LNvs. Since firing in bursts has been associated to neuropeptide  
28 release, we hypothesized that  $I_h$  would be important for LNvs communication. Indeed, herein we  
29 demonstrate that  $I_h$  is fundamental for the recruitment of PDF filled dense core vesicles to the  
30 terminals at the dorsal protocerebrum and for their timed release, and hence for the temporal  
31 coordination of circadian behaviors.

32

## 33 **Introduction**

34 Circadian (*circa*: around, *diem*: day) rhythms are biological rhythms with a period of  
35 approximately 24h that have evolved in essentially all organisms. They confer an important  
36 adaptive value by allowing the anticipation to the daily changes in environmental conditions  
37 associated to the rotation of our planet. The “around the clock” coordination of behavior and  
38 physiology in *Drosophila* is regulated by approximately 150 neurons grouped in different clusters  
39 and named after their anatomical localization (1). Among them, the small lateral ventral neurons  
40 (sLNvs) have been identified as a fundamental group in the control of behavioral rhythms under  
41 free running conditions, communicating via the release of the neuropeptide Pigment Dispersing  
42 Factor (PDF) (2-5) and glycine (6). The large lateral ventral neurons (lLNvs), on the other hand, are  
43 highly relevant for arousal and the PDF they release provides wake promoting functions (7-9).

44 Although the mechanisms that give rise to the cell-autonomous cycling of gene and protein  
45 expression and comprise the core of the molecular clock have been described thoroughly (10), one  
46 of the challenges of the field now is to understand how different clock neurons communicate to  
47 each other. It is indeed the emerging properties of these clock neuronal circuits acting concertedly  
48 that provide the system with plasticity and adaptability (11). But to understand the  
49 communication taking place within clock neurons, it is paramount to examine the physiological  
50 properties of the different neuronal groups. The type, amount and distribution of ion channels

51 present in the membrane of a neuron determine features such as excitability and action potential  
52 firing pattern. In particular, clock neurons change their electrical activity on a daily basis, with  
53 higher action potential firing during the day than at night, a phenomenon that has been described  
54 both in mammals and flies (reviewed in (12)).

55 In *Drosophila*, several ion channels have already been found to play roles in different aspects  
56 of circadian function, such as the calcium dependent voltage-gated potassium channel *slowpoke*  
57 (*slo*) (13, 14) and its binding protein (*slob*) (13, 15, 16), the cation channel *narrow abdomen* (*na*)  
58 (17-19), the voltage-gated potassium channel *Shaw* (20, 21), the inward rectifying potassium  
59 channel *Ir* (22), the temperature sensitive *trpA1* channel (23), the potassium channel *hyperkinetic*  
60 (*hk*) (24) and the voltage-gated potassium channel *Shal* (21, 25). Under the hypothesis that  
61 additional ion channels are involved in determining the characteristic physiological properties of  
62 the LNvs that ensure circadian organization of locomotor activity, we performed a behavioral  
63 genetic screen downregulating candidate ion channels using RNA interference (RNAi) specifically in  
64 LNvs. Following this strategy, we have been able to identify several ion channels that, when  
65 knocked down, alter circadian locomotor behavior under free running conditions. Of those, we  
66 have first focused our attention on the hyperpolarization-activated cation current  $I_h$ , since, as it has  
67 been described in mammalian neurons (26), its biophysical properties make it particularly suitable  
68 to mediate the organization of action potential firing in bursts, a firing mode that characterizes  
69 ILNvs (27-29) and, we show here, also sLNvs. Consistently, we demonstrate that perturbing  $I_h$   
70 causes a decrease in the frequency of LNvs bursting that is accompanied by a reduction in PDF  
71 immunoreactivity and in the complexity of sLNv axonal termini. Moreover, we have found that the  
72 disruption of  $I_h$  is accompanied by an increase in sleep. Altogether, our results reveal a novel  
73 function of  $I_h$  in determining LNvs physiology and the behaviors they command, and uncover  
74 several additional ion channels with putative roles in these important clock clusters, for future  
75 exploration.

76

## 77 **Results**

### 78 **LNvs ion channel downregulation behavioral screen**

79 To shed light onto how LNvs achieve the physiological properties that allow them to play a  
80 key role in the circadian organization of locomotor activity, we performed an ion channel  
81 downregulation behavioral screen. The *pdf-Gal4* driver, in the presence of *UAS-dicer2* (from here  
82 on *pdf,dicer*) was used to drive expression of UAS-RNAis to knock down the expression of

83 candidate ion conductances solely in LNvs. The RNAis were chosen to target ion channel genes,  
84 genes coding for ion channel auxiliary subunits or genes coding for ion channel transporters which  
85 had not been reported to be involved in LNvs-driven circadian phenotypes before. The locomotor  
86 activity of *pdf,dicer*>RNAi male flies was recorded using *Drosophila* Activity Monitors (DAM,  
87 Trikinetics) for 9 days in DD after 3 days of LD entrainment. Each RNAi was initially tested once  
88 and, in the case of showing a differential phenotype in DD, corresponding to either a change of  
89 circadian period or deconsolidation of locomotor activity, experiments were repeated. In some  
90 cases a non-significant trend towards a phenotype was detected and therefore two RNAis that  
91 targeted different regions of the same gene were genetically combined to achieve a more potent  
92 downregulation. **Table 1** shows the positive hits of our screen, revealing novel ion channels or ion  
93 channel auxiliary subunits likely to play roles in LNvs circadian function, namely: *cacophony* (*cac*,  
94 CG1522), *Ca- $\alpha$ 1T* (*Ca<sup>2+</sup>-channel protein  $\alpha_1$  subunit T*, CG15899), *ClC-a* (*Chloride channel-a*,  
95 CG31116), *CngA* (*Cyclic nucleotide-gated ion channel subunit A*, CG42701), *I<sub>h</sub>* (*I<sub>h</sub> channel*, CG8585),  
96 *Ork1* (*Open rectifier K<sup>+</sup> channel 1*, CG1615), *Shal* (*Shaker cognate I*, CG9262) and *tipE* (*temperature-*  
97 *induced paralytic E*, CG1232). The RNAis that did not show altered circadian phenotypes in our  
98 screen are listed in **S1 Table**. In total 70 RNAis aimed at 36 different genes were tested.

99 Although all of the ion channel genes that resulted positive hits of our behavioral screen  
100 are worth of further assessment, we focused our attention on the hyperpolarization-activated  
101 cation current *I<sub>h</sub>*. Little is known about this channel in *Drosophila*, but its homologues in mammals  
102 have been implicated in diverse functions such as the generation of pacemaker potentials and the  
103 determination of neuronal excitability, among others (26). RNAi-mediated downregulation of *I<sub>h</sub>* in  
104 LNvs produced a subtle but consistent decrease in locomotor rhythmicity without altering free  
105 running period (**Tables 1 and 2, Fig 1A**).

106 The *pdf*-Gal4 driver used for the ion channel behavioral screen is active throughout  
107 development. Therefore, to dissect whether the behavioral phenotype observed was due to a  
108 developmental defect or to a post-developmental functional role, we downregulated *I<sub>h</sub>* expression  
109 in LNvs in an adult-specific fashion using the GeneSwitch inducible system (30). When the  
110 previously reported *pdf*-GeneSwitch (*pdfGS*) driver (31) was utilized to knock down *I<sub>h</sub>* adult-  
111 specifically in LNvs, we also observed a decrease in circadian rhythmicity (**Table 2, Fig 1B**),  
112 indicating that the *I<sub>h</sub>* channel is necessary post-developmentally in LNvs for the maintenance of  
113 circadian function. As a complementary approach, we assessed the circadian behavior of  
114 previously reported *I<sub>h</sub>* null mutants, *I<sub>h</sub><sup>f01485</sup>* and *I<sub>h</sub><sup>f03355</sup>* (32, 33). As expected, these mutants also

115 showed reduced rhythmicity under free running conditions (**Table 2, Fig 1C**). Not surprisingly,  $I_h$   
116 mutants are less rhythmic than any tissue-specific knock down (LNvs-specific manipulations),  
117 strongly suggesting that  $I_h$  may be necessary not only in LNvs but also in other neuronal types for  
118 the rhythmic organization of locomotor activity under free running conditions. All these genetic  
119 manipulations did not, in any case, produce changes in free running period (**Table 2**). To assess if  $I_h$   
120 is important for circadian function also under entrained conditions, we analyzed morning and  
121 evening anticipatory behavior. Consistent with the strength of the phenotypes observed in DD, we  
122 detected a failure in both, morning and evening anticipation in  $I_h^{f03355}$  mutants, which is less  
123 pronounced in the  $I_h^{f01485}$  mutants and the adult-specific downregulation of  $I_h$ ; no effects were  
124 detected under  $I_h$  constitutive knock down, suggesting potential compensatory mechanisms (**Table**  
125 **2**). Taking together, these results suggest that the  $I_h$  channel contributes to define the firing  
126 properties of neurons controlling circadian behavior.

127

#### 128 **$I_h$ is necessary for high frequency bursting firing of LNvs**

129 One of the main reasons why we decided to select  $I_h$  as the ion channel for in depth  
130 analysis is the association of  $I_h$  with the organization of action potential firing in bursts. It has been  
131 reported, mainly from mammalian thalamic relay and inferior olivary nucleus neurons, that a  
132 combination of a hyperpolarization-activated cation current such as  $I_h$ , together with a low-voltage  
133 activated T-type calcium current (a channel type also uncovered by our screen, **Table 1**), could  
134 mediate a bursting firing mode (26). This is because of  $I_h$  particular biophysical properties, which  
135 opens upon hyperpolarization but carries a depolarizing current (mainly due to the influx of  $\text{Na}^+$ ).  
136 This current takes the membrane potential to the activation threshold of the T-type voltage-gated  
137  $\text{Ca}^{++}$  channel which depolarizes the membrane up to the action potential firing threshold, opening  
138 the classical voltage-gated  $\text{Na}^+$  channels. Because  $I_h$  is slow to close and does not inactivate, the  
139 membrane stays in a depolarized state for longer, generating a burst of action potentials. Once  $I_h$   
140 closes, the classical voltage-gated  $\text{K}^+$  channels that repolarize the membrane, together with the  
141 leak  $\text{K}^+$  channels, produce the after-hyperpolarization that kick starts the following burst,  
142 activating  $I_h$  again (26).

143 Another relevant observation is that firing in bursts is an effective way of releasing  
144 neuropeptides, which are stored in dense core vesicles. In contrast to small clear vesicles  
145 containing classical fast neurotransmitters, neuropeptide-filled dense core vesicles require a larger  
146 amount of  $\text{Ca}^{++}$  entering the cell to activate the machinery that fuses and releases the dense core

147 vesicles content (reviewed in (34, 35)). Since ILNvs have been described to fire action potentials in  
148 a bursting mode (27, 28) and also to be neuropeptide-releasing neurons (2, 36), the hypothesis we  
149 formulated is that  $I_h$  participates in the active bursting firing mode of LNvs and plays a role in the  
150 release of PDF.

151 We first tested our hypothesis in the ILNvs, which have effectively been shown to be  
152 bursting neurons (27, 28). We performed *ex vivo* whole-cell current clamp recordings of control  
153 *pdf*-RFP (expressing a red fluorofore in the LNvs thus enabling the identification of the two  
154 neuronal types due to the difference in the size of their soma) ILNvs and compared their bursting  
155 frequency to  $I_h^{f03355}$  homozygote mutants. Because we have reported that ILNv bursting frequency  
156 also depends on synaptic inputs that are disrupted during the dissection protocol (29) we  
157 compared the bursting frequency of control and  $I_h^{f03355}$  mutant ILNvs at exactly the same time  
158 post-dissection (23 minutes). **Fig 2A and D** show that although ILNvs from  $I_h^{f03355}$  homozygote  
159 mutants can still organize their action potential firing in bursts, they do so at a statistically  
160 significant lower frequency (mean bursting frequency  $\pm$  SEM (bursts/min) are  
161  $ILNvs_{CONTROL}=26.2\pm 0.9$  and  $ILNvs_{Ihf03355}=17.5\pm 1.4$ ). Other parameters, such as overall firing  
162 frequency and membrane potential were not significantly affected in  $I_h^{f03355}$  mutants (**S1 Fig A and**  
163 **B**).

164 Next, we tested our hypothesis in the sLNvs. Information regarding sLNvs  
165 electrophysiological properties is scarce (28, 37), probably due to the technical challenge that their  
166 small soma size represents. However, given the important role that sLNvs play in the control of  
167 circadian behavior, we analyzed their firing properties in detail. We report here that the sLNvs also  
168 fire action potentials organized in bursts (**Fig 2B**). Because obtaining a large amount of recordings  
169 in whole-cell configuration was a difficult task to achieve, we recorded action potential firing rate  
170 and bursting frequency in a cell-attached configuration of the sLNvs of control (*pdf*-RFP) and  $I_h^{f03355}$   
171 homozygote mutants. We found that, similarly to ILNvs, sLNvs show a decreased bursting  
172 frequency in the absence of  $I_h$  (**Fig 2C and D**, mean bursting frequency  $\pm$  SEM (bursts/min) are  
173  $sLNvs_{CONTROL}=25.7\pm 1.2$  and  $sLNvs_{Ihf03355}=19.3\pm 1.3$ ), without significantly affecting overall firing  
174 frequency (**S1 Fig C**).

175 A feature that should be remarked is that both types of LNvs display equivalent basal  
176 bursting frequencies (**Fig 2D**), suggesting that this parameter depends on common synaptic inputs  
177 and/or shared intrinsic mechanisms. We have previously reported that ILNvs bursting frequency  
178 relies to some extent on synaptic inputs coming from the visual neuropiles, which indirectly

179 involve L2 lamina neurons and the neurotransmitter acetylcholine (29). The dependence of ILNv  
180 bursting on these synaptic inputs is illustrated by the fact that this parameter decays as a function  
181 of the time elapsed since brain dissection, which removes the retina (29). We found that sLNv  
182 bursting frequency also decays with time *ex vivo*, which can be seen both at the population level  
183 (**S2 Fig A**) and also in individual cells (**S2 Fig B-C**), suggesting that both types of LNvs depend on  
184 synaptic inputs which are gradually lost after dissection. Alternatively, it might be that ILNvs rely  
185 on visual circuit inputs to burst, and sLNv bursting depends on ILNv bursting. Certainly, the  
186 neuronal processes of ILNvs are better localized, spanning all over the optic lobes, to integrate  
187 visual information. However, the sLNvs have been shown to receive direct input from the  
188 Hofbauer-Buchner (HB) eyelet extraretinal organ (38), whose integrity may also be compromised  
189 during dissection. Whether sLNvs and ILNvs rely on different or similar synaptic inputs to support  
190 bursting frequency, or if one LNv group depends on the other to detect synaptic information from  
191 visual organs, will require further investigation.

192 We also compared bursting frequency at a different time post-dissection; interestingly,  
193 this analysis showed that both large and small LNvs present equivalent bursting frequency, and  
194 the lack of  $I_h$  produces a significant reduction of this parameter, which is of the same magnitude in  
195 the two LNv groups (**S2 Fig D**, compare to Fig 2D, mean bursting frequency  $\pm$  SEM (bursts/min) are  
196 as following  $ILNvs_{CONTROL}=21.0\pm 0.9$ ,  $ILNvs_{Ihf03355}=13.8\pm 0.9$ ,  $sLNvs_{CONTROL}=21.1\pm 1.5$ ,  
197  $sLNvs_{Ihf03355}=14.6\pm 0.9$ ). Altogether, our results suggest that both LNv clusters share common  
198 mechanisms to control their bursting firing frequency, which appear to be controlled intrinsically,  
199 likely involving the  $I_h$  current, as well as rely on synaptic inputs.

200

### 201 **$I_h$ channel and the sLNvs outputs**

202 Over the years it has been demonstrated that communication from the sLNvs to other  
203 clock clusters is crucial for coherent circadian behavior under free running conditions (2, 3, 5, 6,  
204 14, 39-41). The rhythmic accumulation of PDF neuropeptide in sLNvs axonal termini has been  
205 implicated in this communication, with high immunoreactivity detected in the early morning and  
206 low immunoreactivity at night (42). We hypothesized that release of dense core vesicles  
207 containing PDF would be affected by the decrease in bursting activity that accompanies  $I_h$   
208 downregulation. To test this, we performed anti-PDF immunofluorescence in whole brains of flies  
209 with adult-specific downregulation of  $I_h$ . **Fig 3A-B** shows that PDF immunoreactivity in controls

210 (*pdfGS/+*) displays the normal cycling pattern; however, upon downregulation of  $I_h$  (in *pdfGS>I<sub>h</sub><sup>RNAi</sup>*)  
211 PDF levels at the axonal termini are constantly reduced and clamped in a night-like state.

212 In addition to PDF cyclic accumulation, sLNvs show circadian variation of the complexity of  
213 their axonal arborizations (43) in order to contact different synaptic targets at different times of  
214 the day (44). This structural synaptic plasticity has been shown to be activity-dependent (31, 45,  
215 46), therefore we wondered whether  $I_h$  downregulation would affect this property. **Fig 3C-D** shows  
216 that total axonal crosses measured by Sholl analysis in controls display the normal cycling pattern,  
217 where the terminals are maximally spread (and more complex) in the early morning and less  
218 complex at night, where axonal terminals are collapsed together. In contrast,  $I_h$  downregulation  
219 leads to axonal projections that display little complexity throughout the day, accompanying the  
220 reduced PDF levels. Our speculation on why  $I_h$  downregulation leaves both, PDF and terminal  
221 complexity at levels similar to ZT14 is that  $I_h$  underlies high activity bursting firing, a property that  
222 is functional during the day. Downregulation of this channel impairs this high frequency bursting  
223 that would be associated to increased PDF levels and the spreading of sLNv axonal projections in  
224 the morning, both phenomena that have been described to be clock and activity-dependent (31,  
225 45, 46). Moreover, we have previously described that structural plasticity depends on PDF levels  
226 (47), so the collapsed state of the projections could be linked to PDF decrease as well. To  
227 corroborate whether the defects shown upon  $I_h$  downregulation are linked to reduced PDF levels  
228 we used the GeneSwitch system to express *pdf* in the context of  $I_h$  downregulation. **Fig 4A, C-D**  
229 shows that indeed, in the context of a surplus of PDF, cycling of this neuropeptide in the sLNvs  
230 axonal terminals is restored, while PDF expression in controls cycles with reduced (yet significant)  
231 amplitude.

232 To investigate whether the decreased PDF levels seen at the dorsal projections are due to  
233 decreased PDF production or to a failure to recruit PDF-loaded vesicles (i.e. transport) towards the  
234 axonal terminal, we measured PDF levels in the sLNv somas. We analyzed somatic PDF levels (see  
235 methods) and found that PDF immunoreactivity cycles in the sLNv somas in a way that resembles  
236 its cycling at the axonal terminals, with more PDF during the early morning and less PDF at the  
237 beginning of the night (**Fig 4B, E-F**). Interestingly, in the context of  $I_h$  downregulation, somatic PDF  
238 shows an abnormal accumulation during the night, which could be due to a decreased day-time  
239 transport towards the axonal terminals that results in anti-phase cycling of somatic PDF levels. PDF  
240 overexpression *per se* increases overall levels, preventing PDF cycling in the somas, albeit not in  
241 the terminals. On the other hand, PDF overexpression in the context of  $I_h$  knock down does not



242 rescue the night-time abnormal PDF accumulation in the somas, however, it does rescue cycling in  
243 the projections (**Fig 4C**).

244 Although PDF overexpression rescues some of the  $I_h$ -related phenotypes at the cellular  
245 level, it fails to rescue free running behavior (**Fig 4 G-H**). A plausible explanation for this may be  
246 that PDF cycling in the terminals, although rescued, still shows reduced amplitude (**Fig 4D**) and  
247 may not be enough to synchronize the remaining clusters. Alternatively,  $I_h$  downregulation and the  
248 associated reduction of bursting frequency may be affecting the release of other neuropeptides or  
249 neurotransmitters besides PDF, which might also contribute to the neuronal communication  
250 needed to maintain rhythmicity under constant conditions. PDF expression in the context of  $I_h$   
251 downregulation subtly shortens the free-running period (**Fig 4H**), which is reminiscent of reduced  
252 PDF levels (2), although the underlying mechanisms remain to be explored.

253 Overall, these results indicate that  $I_h$  defines an essential property of the sLNvs that  
254 ensures proper regulation of neuropeptide levels and structural plasticity, and provide a causal  
255 link between the alteration of electrical activity and the disruption of circadian behavior.  
256 Moreover, the careful determination of PDF levels in the sLNv somas suggest that in the context of  
257  $I_h$  downregulation there is defective PDF transport towards the axonal projections, underscoring  
258 that action potential firing is responsible for an active recruitment of dense core vesicles to the  
259 terminals.

260

### 261 **Sleep and the $I_h$ channel**

262 We then examined whether reduction in bursting firing frequency and hence,  
263 neuropeptide release, could affect sleep behavior. We first quantified sleep behavior in  $I_h^{f03355}$   
264 mutants and found that homozygotes displayed an increase in total sleep, mainly due to a  
265 significant rise in the number of sleep bouts, which while shorter in duration did not compensate,  
266 and resulted in an increase in total sleep during nighttime. Notably, the increase in sleep was more  
267 conspicuous towards the end of the night (**Fig 5A-D, Table 3**). Given the ubiquitous nature of this  
268 genetic manipulation we reasoned that the deconsolidated sleep phenotype could arise from the  
269 lack of  $I_h$  in a plethora of neurons; we therefore continued the analysis using  $I_h$  RNAi-mediated  
270 downregulation in specific LNv clusters.

271 It has previously been demonstrated a significant role of the lLNvs in arousal, as the PDF  
272 released by these neurons works as a strong arousal signal (7-9). We therefore analyzed sleep  
273 after acute downregulation of the  $I_h$  channel in the lLNvs and other non-circadian peptidergic

274 neurons (combining the *c929*-Gal4 driver with the TARGET system (48)). Similar to the  $I_h$  mutants,  
275 these flies exhibited an increase in the number of sleep episodes that resulted in a significant rise  
276 in nighttime sleep (**Fig 5 E-H, Table 3**); however the duration of the sleep bouts remains  
277 unchanged, indicating that the short sleep bout phenotype observed in  $I_h$  mutants must derive  
278 from the lack of  $I_h$  in neurons not covered by the *c929*-Gal4 driver.

279 Although PDF released from the sLNvs has not been shown to play an arousal role as the  
280 one released by the lLNvs, diverse lines of evidence lend support to the notion that sLNvs can have  
281 an impact on sleep behavior (49, 50). To test if  $I_h$  from sLNvs had any influence on sleep behavior,  
282 we resorted to the sLNv-specific driver R6-Gal4 (51). As a consequence of acute downregulation of  
283 the  $I_h$  channel in sLNvs, flies showed a robust increase in the amount of sleep, both at daytime and  
284 nighttime (**Fig 5 I-L, Table 3**). Surprisingly, this rise in sleep was due to a more consolidated sleep,  
285 as the sleep bout number was reduced but episodes lasted longer in the experimental flies  
286 compared to the genetic controls.  $I_h$  downregulation experiments were also performed  
287 constitutively, showing similar tendencies than the acute ones (**Table 3**).

288 Given that  $I_h$  downregulation in both clusters resulted in an increase in sleep with different  
289 characteristics, we tested whether  $I_h$  downregulation in all PDF-positive neurons would result in an  
290 additive effect. However, this was not the case, and concomitant  $I_h$  knock down correlates with an  
291 increase in sleep of similar magnitude. In fact, in case of constitutive downregulation, no  
292 significant differences were identified (**Table 3**). Thus, both groups could be contributing to sleep  
293 regulation through different mechanisms/signals that, when impaired at the same time, result in a  
294 nonlinear combination of effects. Acute and cell-type specific manipulations of LNvs are therefore  
295 required to dissect the control of sleep behavior.

296 Collectively, our work demonstrates that  $I_h$  certainly plays a role in the control of sleep  
297 behavior, both on the overall levels and the timing of sleep. Alterations in the timing of sleep is  
298 particularly prevalent, highlighted by a recurrent decrease in the latency to the first sleep episode  
299 after lights-on observed in the majority of the  $I_h$  genetic manipulations (**Table 3**). Further work will  
300 be necessary to pinpoint how different neurons recruit  $I_h$  to regulate various aspects of their  
301 physiology. In particular, the role of neuropeptides in sleep control is widely recognized and  
302 involves many neurons throughout the brain. We have initiated here an analysis that includes the  
303 sLNvs, the lLNvs+other peptidergic non-circadian neurons and the sLNvs+lLNvs, but it is likely that  
304  $I_h$  manipulation will impair neuropeptide trafficking in other sleep-related neurons as well.

305

## 306 Discussion

307 The physiology of a particular neuron is not regulated by a single ion channel type, but by  
308 a complex array of different players; they go from the leak conductances that determine input  
309 resistance and resting membrane potential which influence dendritic processes, including  
310 summation and propagation of synaptic inputs, to the abundance and quality of voltage-gated ion  
311 channels that determine the dynamics of action potential firing, and ultimately dictate the release  
312 of classical neurotransmitters and neuropeptides. If we add to this picture the channels that are  
313 directly or indirectly activated by ligands we will be able to comprehend, and model, neuronal  
314 physiology. We have performed a downregulation screen to describe novel ion channels playing  
315 roles in establishing the electrical properties of the LNvs, with the aim of advancing the  
316 understanding of LNvs physiology. We focused our attention on  $I_h$ , a poorly studied ionic current in  
317 *Drosophila*.

318 Since the discovery of the first hyperpolarization-gated current in cardiac function (52) a  
319 great deal of information has been gained about the role of this type of channels in determining  
320 the physiology of the mammalian heart and brain (26). An interesting feature of  $I_h$  channels is that  
321 they are not only sensitive to hyperpolarization, but are also modulated by cyclic nucleotides,  
322 hence the name of the channel family HCN (for Hyperpolarization Cyclic Nucleotide-gated). The  
323 mammalian genome contains four HCN channel genes HCN1-4, each with specific activation  
324 characteristics, distinct but in some cases partially overlapping expression patterns, and different  
325 roles in neuronal physiology (53). *Drosophila*'s  $I_h$  channel is the sole member of the HCN family in  
326 its genome (54), but up to 12 different splice variants can be generated, providing diverse  
327 channels with particular biophysical properties (55). A phylogenetic analysis indicates that  
328 *Drosophila I<sub>h</sub>* (also referred in the literature as DMIH) diverged from a common ancestor before  
329 the emergence of the four vertebrate subtypes (56). Interestingly, the domain organization of  $I_h$  is  
330 similar to its vertebrate counterparts, and the interaction between domains is conserved to the  
331 point that domain swapping between *Drosophila I<sub>h</sub>* and vertebrate HCN channels produce similar  
332 biophysical results (57).

333 *Drosophila I<sub>h</sub>* has not been explored in depth yet but it has been reported in the visual  
334 system where it regulates the release of glutamate from amacrine cells (33), and at the larval  
335 neuromuscular junction where it affects neurotransmitter release (58). An analysis of  $I_h$  mutants  
336 shows that this channel controls a variety of behaviors (32). Particularly relevant for our work is  
337 the fact that  $I_h$  has been reported to control circadian rhythms and sleep in *Drosophila* by acting on

338 dopaminergic neurons (59). Although Gonzalo-Gomez *et al.* (2012) did not find any PDF  
339 disruptions in the sLNvs of the  $I_h$  mutants they generated, our current analysis of adult-specific  
340 downregulation of  $I_h$  shows that it does affect PDF levels and the structural plasticity at the sLNvs  
341 dorsal projections, as well as the accumulation of PDF in the somas albeit with altered circadian  
342 dynamics. This highlights the importance of using strategies where a genetic manipulation is  
343 performed acutely, in order to avoid homeostatic compensations that may conceal a phenotype.  
344 Altogether the collective evidence indicates that  $I_h$  may be modulating circadian rhythms and sleep  
345 by exerting its role in more than one neuronal type. Whether the molecular mechanisms that  
346 regulate, and are regulated by  $I_h$  in LNvs and in dopaminergic neurons are similar will require  
347 further examination.

348 Sleep behavior has been previously reported in  $I_h$  mutant flies, and, taking into account  
349 our contribution, the accumulated evidence raises some controversy that deserves special  
350 attention. Using an independently generated  $I_h$  null mutant, Gonzalo-Gomez *et al.* (2012) reported  
351 that total sleep was unchanged; but they showed, similar to our results, a deconsolidation of sleep  
352 resulting from an increase in sleep bout number of shorter duration (59). On the other hand,  
353 during the initial characterization of the mutants used in our study, Chen *et al.* reported the  
354 opposite sleep phenotype, that is, a decrease in total sleep, with no changes in bout number (32).  
355 One important element to take into account is that  $I_h$  mutant flies are hyperactive (**Table 3**) and  
356 therefore inferring sleep from activity data should be approached with caution. Since  $I_h$  mutants  
357 display an increase in sleep, and hyperactivity would result in an underestimation of sleep, our  
358 results are validated. It is not uncommon to come across published fly sleep data inferred from  
359 activity monitoring where basal activity is not reported (32), a practice that warrants further  
360 attention.

361 Perhaps more informative than the mutants is our sleep analysis following acute and  
362 cluster-specific downregulation of  $I_h$ . We show here that  $c929+$  peptidergic neurons use  $I_h$  to  
363 promote arousal, which in the case of the ILNvs would likely be mediated by PDF release following  
364 high frequency neuronal bursting. However, the release of other neuropeptides could also be  
365 affected by  $I_h$  downregulation; in fact additional neurons besides ILNvs contribute to the waking  
366 state within the  $c929$ -Gal4 driven group (8). Moreover, specific downregulation of  $I_h$  in the sLNvs  
367 also results in an increase of sleep, however, this increase corresponds to a more consolidated  
368 sleep and therefore, although an increase in total sleep is produced upon  $I_h$  downregulation with  
369 both R6-Gal4 and  $c929$ -Gal4, the properties of these sleep increase are different. This may indicate

370 that, either the neuropeptide/s these neuronal clusters are releasing with the help of  $I_h$ , or the  
371 effects these signals are conveying to their particular postsynaptic targets, are probably different.  
372 These findings should be thoroughly characterized in the future, as they provide clear evidence of  
373 the participation of the sLNvs in the neuronal circuits governing sleep. Interestingly, in a recent  
374 genome-wide association study, ion channels were one of the two main pathways associated to  
375 sleep duration both in humans and flies, indicating an evolutionarily conserved function of ion  
376 channels in regulating a complex behavior such as sleep (60).

377         Although no role has been directly demonstrated for  $I_h$  in *Drosophila* clock neurons before  
378 our work, the HCN family has been proposed to contribute to the circadian variations in neuronal  
379 excitability in the mammalian suprachiasmatic nucleus (SCN) (61). HCN channels have been  
380 reported to be expressed in the SCN (62) but their function has been difficult to discern due to a  
381 lack of strong and significant phenotypes following genetic and pharmacologic manipulations,  
382 which could be due to the heterogeneity of the SCN neuronal population and the genetic  
383 compensation that may arise from having several HCN channel genes (63-65). Taking advantage of  
384 the fact that *Drosophila* clock neuron clusters are well identifiable, and that there is only one  
385 member of the HCN channel family, we were able to show that  $I_h$  is a crucial player defining the  
386 high activity bursting physiology of LNvs, and that this regulates neuronal outputs and behavior.

387         The role of cyclic nucleotide cascades in LNvs has been mainly focused on their capacity as  
388 transducers of information that impacts on gene expression in the context of the regulation of the  
389 circadian clock (66, 67). Our screen has uncovered two cyclic nucleotide-modulated channels ( $I_h$   
390 and CngA), suggesting that the integration of information signaled by cyclic nucleotides is crucial  
391 for circadian function also at rapid time frames, a hypothesis that has already been proposed (67,  
392 68). The case of  $I_h$ , being modulated by both hyperpolarizing voltage and cyclic nucleotides,  
393 provides additional complexity, as they could serve as coincidence detectors (scheme in **Fig 6**). The  
394 biophysics of  $I_h$ , and therefore the firing properties of LNvs, are affected by both the membrane  
395 voltage and the levels of cyclic nucleotides, therefore it is likely that the timing of arrival of these  
396 signals may significantly affect the LNvs neuronal output. Albeit purely speculative for the LNvs,  
397 the  $I_h$  current has been proposed to work as a coincidence detector in other systems (69-71).  
398 Further research will be necessary to reveal which are the neuronal inputs that contribute to the  
399 hyperpolarization and to the variations of cyclic nucleotide levels. Interestingly, HCN channels  
400 have been reported to be activated by Vasoactive Intestinal Peptide (72), which is considered a  
401 functional homolog of PDF. Therefore, activation of the PDFR signaling cascade could result in an

402 increase in cyclic nucleotide (i.e., cAMP) thus modulating  $I_h$ , adding players to the already  
403 complicated integration of synaptic and cell-autonomous cues coordinated at the sLNvs.

404 One question that remains to be answered is whether the circadian clock is directly  
405 regulating  $I_h$  function in LNvs. Although our work has not focused on this issue, a plausible  
406 hypothesis is that  $I_h$  expression levels may be changing at different times of the day. This is  
407 suggested by the work by Abruzzi *et al.* (2011) where they performed chromatin  
408 immunoprecipitation tiling array assays with a number of circadian proteins, and showed that the  
409 circadian transcription factor CLOCK cycles in its binding to  $I_h$  regulatory sequences in *Drosophila*  
410 heads (73). Among all the positive hits of our screen,  $I_h$  is the only one that appears to be directly  
411 controlled by the circadian clock according to Abruzzi *et al.* (2011).

412 Our experiments demonstrate that the sLNvs, considered a central piece of the clock  
413 neuron circuitry puzzle, organize their action potential firing in bursts. This bursting frequency  
414 depends on synaptic input as it has been shown for the lLNvs (29). LNvs bursting frequency seems  
415 to be also influenced by cell autonomous mechanisms since, as we demonstrate here, a null  
416 mutation in  $I_h$  produces a decrease in this parameter. Interestingly, the mutation produces a  
417 decrease that is of the same magnitude in sLNvs and lLNvs, suggesting that this ion channel  
418 regulates bursting frequency in comparable ways in both neuronal types. Remarkably, the DN1  
419 clock neuron cluster has recently been shown to fire action potentials in bursts and that this  
420 temporal coding, i.e. the timing of spiking, is relevant for the control of sleep behavior (16).

421 The importance of gaining as much information as possible about the  $I_h$  current is  
422 underscored by the discovery of several  $I_h$  channelopathies. Information from both, patients and  
423 genetic animal models, has brought to light the relation of mutations on *HCN* channel genes, or  
424 accessory subunits, to different conditions such as of epilepsies, autism spectrum disorders,  
425 neuropathic pain, Parkinson's disease, depression and cardiac dysfunction among others (74-76).  
426 In this context, learning about *Drosophila*  $I_h$  helps understanding the basic characteristics of this  
427 current and *Drosophila*, with its less complex genome and fantastic genetic amenability, could  
428 serve in the future as a model organism to discover interacting proteins and pathways, to  
429 ultimately unravel the underlying pathological mechanisms of  $I_h$  channelopathies.

430

## 431 **Materials and Methods**

### 432 ***Fly Strains***

433 All fly strains used in this study are detailed in **S2 Table**. UAS lines for RNAi downregulation of  
434 candidate ion channels were obtained from the Bloomington Stock Center (the ones associated to  
435 the *Drosophila* RNAi Screening Center, DRSC), from the Vienna *Drosophila* Resource Center (VDRC)  
436 and from the National Institute of Genetics Fly Stock Center (NIG). Information for each of these  
437 lines is also available in Table 1 (for the positive hits of the genetic screen) and in S1 Table (for the  
438 negative hits). Flies were grown and maintained at 25°C in standard cornmeal medium under  
439 12:12h light:dark cycles unless stated otherwise. For experiments involving the adult-specific  
440 GeneSwitch expression system, 2-4 day old adult males raised in normal cornmeal food were  
441 transferred to food containing RU486 (mifepristone, Sigma) in 80% ethanol to a final  
442 concentration 200 µg/ml or with the same amount of ethanol (vehicle) in control treatments.  
443 These experiments were done with a line that includes a UAS-CD8::GFP transgene on the II  
444 chromosome. For experiments involving the TARGET system (48) flies were raised at 21°C,  
445 induction of the expression system was achieved by increasing the temperature to 30°C. Newly  
446 eclosed males were used for all circadian rhythmicity experiments, 3-7 day-old non-virgin females  
447 were used for sleep and electrophysiology experiments, a mix of males and females was used for  
448 immunofluorescence determination.

449

#### 450 ***Locomotor Behavior Analysis***

451 Flies were entrained to 12:12h light:dark cycles during their entire development, and newly  
452 eclosed adult males were placed in 65 x 5 mm glass tubes and monitored for activity with infrared  
453 detectors and a computerized data collection system (Trikinetics, Waltham, MA). For experiments  
454 involving the GeneSwitch expression system, newly eclosed adult males were placed in glass tubes  
455 containing standard food (supplemented with 200 mg/ml RU486 or vehicle, as indicated) and  
456 monitored for activity. Activity was monitored in LD conditions for 3-4 days, followed by constant  
457 darkness for at least nine days (DD1–9). Period and rhythmicity parameters as FFT and power were  
458 estimated using ClockLab software (Actimetrics). Flies with a single peak over the significance line  
459 ( $p < 0.05$ ) in a  $\chi^2$  analysis were scored as rhythmic, which was confirmed by visual inspection of the  
460 actograms. For LD anticipatory analysis, the last day before switching to DD was used. Average  
461 activity plots at the population level were produced using the Clocklab average activity function  
462 for each animal, relativized to its own activity, integrated in 30 minutes bins and then the  
463 population average for each genotype was calculated. Morning Anticipation Index (MAI) was  
464 calculated as follow, the sum of relativized activity from ZT21.5 from the previous day to ZT0 was

465 divided by the sum of relativized activity from ZT19 from the previous day to ZT0 for each animal.  
466 Since data was not normally distributed a non-parametric ANOVA analysis, Kruskal-Wallis test  
467 followed by Dunn's multiple was used to test statistically significant differences. An equivalent  
468 procedure was performed for the Evening Anticipation Index (EAI) using data from ZT7 to ZT12.

469

#### 470 ***Sleep Behavior Analysis***

471 Female flies were socially housed in vials from eclosion at 25°C under 12:12h light:dark cycles until  
472 they were 4 to 6 days-old and afterwards transferred to 65 x 5 mm glass tubes (Trikinetics,  
473 Waltham, MA) containing normal cornmeal food. Tubes were loaded onto DAM monitors and  
474 locomotor activity was assessed using the DAM system under 12:12h light:dark cycles. Sleep data  
475 was calculated on the second day after fly loading into tubes to allow them to recover from  
476 anesthesia and to acclimate to the new environment. For experiments using the TARGET system  
477 (77) flies were raised at 21°C, socially housed in vials from eclosion until they were 6 days-old and  
478 afterwards transferred to 65 x 5 mm glass tubes. Monitors were kept for two days at 21°C to  
479 measure sleep under the restrictive temperature at which the RNAi is not expressed (which in all  
480 cases produced no effect), and then the incubator temperature was raised to 30°C for two more  
481 days to allow RNAi expression, always under 12:12h light:dark cycles. Sleep data was calculated on  
482 the second day at 30°C. The DAM System binning time was set to 1min. Sleep was defined as no  
483 movement for 5min (78, 79). Rethomics, a collection of packages running in R language (80), was  
484 used to infer sleep from locomotor activity data, to build graphs of sleep for 30min as a function of  
485 the time of day, to get measurements of total sleep, day sleep, night sleep, sleep bout duration,  
486 sleep bout number, latencies to lights on and off and to get an activity index (defined as the  
487 average activity counts in the active minutes) of each individual fly. Behavioral experiments were  
488 conducted at least 2-3 times, with 15 to 30 individuals per genotype.

489

#### 490 ***Electrophysiology***

491 Three to seven days-old female flies were anesthetized with a brief incubation of the vial on ice,  
492 brain dissection was performed on external recording solution which consisted of (in mM): 101  
493 NaCl, 3 KCl, 1 CaCl<sub>2</sub>, 4 MgCl<sub>2</sub>, 1.25 NaH<sub>2</sub>PO<sub>4</sub>, 5 glucose, and 20.7 NaHCO<sub>3</sub>, pH 7.2, with an  
494 osmolarity of 250 mmol/kg (based on solution used by Cao and Nitabach, 2008). After removal of  
495 the proboscis, air sacks and head cuticle, the brain was routinely glued ventral side up to a sylgard-  
496 coated coverslip using a few µl of tissue adhesive 3M Vetbond. The time from anesthesia to the



497 establishment of the first successful recording was approximately 15-19min spent as following: 5-  
498 6min for the dissection, 4-5min for the protease treatment to remove the brain's superficial glia  
499 and 6-8min to fill and load the recording electrode onto the pipette holder, approach the cell,  
500 achieve the gigaohm seal and open the cell into whole-cell configuration to start recording. LNvs  
501 were visualized by red fluorescence in *pdf*-RFP using a Leica DM LFS upright microscope with 63X  
502 water-immersion lens and TK-LED illumination system (TOLKET S.R.L, Argentina). Once the  
503 fluorescent cells were identified, cells were visualized under IR-DIC using a Hamamatsu ORCA-ER  
504 camera and Micro Manager software. lLNvs were distinguished from sLNvs by their size and  
505 anatomical position. To allow the access of the recording electrode, the superficial glia directly  
506 adjacent to LNvs somas was locally digested with protease XIV solution (10mg/ml, SIGMA-ALDRICH  
507 P5147) dissolved in external recording solution. This was achieved using a large opened tip  
508 (approximately 20 $\mu$ m) glass capillary (pulled from glass of the type GC100TF-10; Harvard  
509 Apparatus, UK) and gentle massage of the superficial glia with mouth suction to render the  
510 underlying cell bodies accessible for the recording electrode with minimum disruption of the  
511 neuronal circuits. After this procedure, protease solution was quickly washed by perfusion of  
512 external solution. Recordings were performed using thick-walled borosilicate glass pipettes  
513 (GC100F-10; Harvard Apparatus, UK) pulled to 6-7 M $\Omega$  using a horizontal puller P-1000 (Sutter  
514 Instruments, US) and fire polished to 9-12 M $\Omega$ . Recordings were made using an Axopatch 200B  
515 amplifier controlled by pClamp 9.0 software via a Digidata 1322A analog-to-digital converter  
516 (Molecular Devices, US). Recording pipettes were filled with internal solution containing (in mM):  
517 102 potassium gluconate, 17 NaCl, 0.085 CaCl<sub>2</sub>, 0.94 EGTA and 8.5 HEPES, pH 7.2 with an  
518 osmolarity of 235 mmol/kg (based on the solution employed by Cao and Nitabach, 2008). Cell-  
519 attached configuration was achieved by gentle suction and recordings were performed in voltage-  
520 clamp mode with no hold. For whole-cell configuration, gigaohm seals were accomplished using  
521 minimal suction followed by break-in into whole-cell configuration using gentle suction in voltage-  
522 clamp mode with a holding voltage of -60mV. Gain of the amplifier was set to 1 during recordings  
523 and a 5kHz Lowpass Bessel filter was applied throughout. Spontaneous firing was recorded in  
524 current clamp (I=0) mode. Analysis of traces was carried out using Clampfit 10.4 software. Bursting  
525 frequency was calculated as the number of bursts in a minute of recording. For comparisons, all  
526 recordings were quantified at the same time post-dissection as specified in the text and figure  
527 legends. For AP firing rate calculation the event detection tool of Clampfit 10.4 was used. In many  
528 cases we were able to see the two different AP sizes reported previously (28), however, for AP

529 firing rate calculation only the large APs were taken into account. Traces shown in figures were  
530 filtered offline using a lowpass boxcar filter with smoothing points set to 9. Perfusion of external  
531 saline in the recording chamber was achieved using a peristaltic pump (MasterFlex C/L). All  
532 recordings were performed during the light phase, between ZT1 and ZT10.

533

#### 534 ***Immunofluorescence detection***

535 Heads were cut at *zeitgeber* times 2 and 14, fixed in paraformaldehyde 4% in PB 0.1M for 35-45  
536 minutes at room temperature and brains were dissected afterwards, washed 5 times in PBS-Triton  
537 X-100 0.1%, blocked with 7% normal goat serum for 2 hours at RT and incubated with primary  
538 antibody (see antibodies information in **S2 Table**), ON at 4°C. After five 15 minutes washes in PBS-  
539 Triton X-100 0.1%, brains were incubated with the secondary antibody. Confocal images were  
540 obtained in a Zeiss 710 Confocal Microscope or Pascal Confocal Microscope. All the photographs  
541 within the same experiment were taken with the same confocal parameters. In the *pdf*  
542 overexpression experiments (Fig 4), data was relativized to the average of intensities for each  
543 experiment because two different microscopes were used. The acquisition of sLNv soma images  
544 required different confocal parameters (laser intensity, gain, zoom).

545

#### 546 ***PDF quantitation***

547 For the quantitation of PDF intensity at the sLNv projections, we assembled a maximum intensity  
548 z-stack that contains the whole projection (approximate 10 images) and constructed a threshold  
549 image to create a ROI for measure immunoreactivity intensity using ImageJ (NIH). Data was  
550 analyzed with InfoStat software (Universidad Nacional de Córdoba, Argentina) and GraphPad. For  
551 quantitation of PDF intensity at the sLNv somas we used a unique 1  $\mu\text{m}$  image per cell, which was  
552 the one where the PDF cytoplasm immunoreactivity signal could be clearly differentiated from the  
553 empty nucleus. The draw tool from ImageJ (NIH) enabled to measure only the PDF signal at the  
554 cytoplasm, and this procedure was repeated for each cell (3-4) in each brain (only one brain  
555 hemisphere). Background intensity was subtracted for each brain and average intensity was  
556 calculated. Data was normalized using the average intensity for the whole population of brains of  
557 the experiment. This way of quantifying PDF in the sLNvs somas allowed a more precise  
558 assessment of neuropeptide levels and it may be the reason why we were able to detect circadian  
559 cycling of PDF levels, unlike previous reports that were unable to detect them (42). Statistics  
560 analysis was done using the GraphPad program, after testing data normality one-way ANOVA and

561 Sidak's multiple comparisons tests were performed to determine time of -day- genotype  
562 differences.

563

### 564 ***Analysis of structural plasticity***

565 To assess the degree of complexity within the sLNvs dorsal projections we performed  
566 immunofluorescence against a membrane version of GFP. The maximum intensity z-stack image  
567 was transformed into a threshold image and Sholl analysis was performed with ImageJ (NIH)  
568 software. Each picture was corroborated by visual inspection to confirm the number of crosses in  
569 every 10  $\mu\text{m}$ -concentric Sholl ring. Data was analyzed by means of InfoStat software (Universidad  
570 Nacional de Córdoba, Argentina).

571

### 572 ***Statistical Analysis***

573 The following statistical analyses were used in this study: one-way ANOVA and two-way ANOVA  
574 with post hoc Tukey's HSD test for multiple comparisons of parametric data, and non-parametric  
575 Kruskal-Wallis statistical analysis with multiple comparisons (p adjustment method = BH) as  
576 specified in figure legends. Parametric tests were used when data were normally distributed and  
577 showed homogeneity of variance, tested by Kolmogorov Smirnov test and Levene's test,  
578 respectively. Sidak's and Dunn's multiple comparisons tests were performed after parametric and  
579 non-parametric ANOVA when GraphPad software was used. Sleep data tended to not show a  
580 normal distribution, hence non-parametric statistics were used. Statistical analyses were  
581 performed using Infostat for circadian rhythmicity and immunofluorescence experiments, R-based  
582 Rethomics package for sleep data and Origin software for electrophysiological parameters. A p  
583 value  $< 0.05$  was considered statistically significant. Throughout the manuscript n represents the  
584 total number of measurements compared in each experimental group (behavior of an individual,  
585 brain morphology, or neuronal recordings, depending of the experiment), and N represents the  
586 number of independent times an experiment was repeated. Boxes in box and whisker plots for  
587 sleep and electrophysiological parameters represent the median and interquartile range (the  
588 distance between the first and third quartiles). In all tables, parameters represent the mean value  
589  $\pm$  standard error of the mean. In dot plots for circadian power and tau and in fluorescence and  
590 structural plasticity quantification lines represent the mean value; error bars depict the standard  
591 error of the mean.

592

## 593 Acknowledgements

594 M.F.C., N.I.M. and L.F. are members of the Argentine Research Council for Science and Technology  
595 (CONICET). This work was supported by the Agencia Nacional de Promoción Científica y  
596 Tecnológica (Grants PICT-2011-2185 to M.F.C. and PICT-2011-2364 and PICT-2015-2557 to N.I.M.),  
597 the CONICET (Grant PIP-11220130100378 to N.I.M.) and FOCEM-Mercosur (COF 03/11 to IBioBA).  
598 The funders had no role in study design, data collection and analysis, decision to publish, or  
599 preparation of the manuscript. Stocks obtained from the Bloomington Drosophila Stock Center  
600 (NIH P40OD018537), the NIG-Fly Stock Center and the Vienna Drosophila Resource Center (81)  
601 were used in this study. We also thank Dr. Zuo Ren Wang for  $I_h$  mutant fly stocks. We thank  
602 Esteban Beckwith and Quentin Geissmann for indispensable help with sleep quantification  
603 software.

604

## 605 References

- 606 1. Yoshii T, Rieger D, Helfrich-Forster C. Two clocks in the brain: an update of the morning and evening  
607 oscillator model in *Drosophila*. *Progress in brain research*. 2012;199:59-82. Epub 2012/08/11.
- 608 2. Renn SC, Park JH, Rosbash M, Hall JC, Taghert PH. A pdf neuropeptide gene mutation and ablation  
609 of PDF neurons each cause severe abnormalities of behavioral circadian rhythms in *Drosophila*. *Cell*.  
610 1999;99(7):791-802. Epub 2000/01/05.
- 611 3. Peng Y, Stoleru D, Levine JD, Hall JC, Rosbash M. *Drosophila* free-running rhythms require  
612 intercellular communication. *PLoS biology*. 2003;1(1):E13. Epub 2003/09/17.
- 613 4. Lin Y, Stormo GD, Taghert PH. The neuropeptide pigment-dispersing factor coordinates pacemaker  
614 interactions in the *Drosophila* circadian system. *J Neurosci*. 2004;24(36):7951-7. Epub 2004/09/10.
- 615 5. Yoshii T, Wulbeck C, Sehadova H, Veleri S, Bichler D, Stanewsky R, et al. The neuropeptide pigment-  
616 dispersing factor adjusts period and phase of *Drosophila*'s clock. *J Neurosci*. 2009;29(8):2597-610. Epub  
617 2009/02/27.
- 618 6. Frenkel L, Muraro NI, Beltran Gonzalez AN, Marcora MS, Bernabo G, Hermann-Luibl C, et al.  
619 Organization of Circadian Behavior Relies on Glycinergic Transmission. *Cell reports*. 2017;19(1):72-85. Epub  
620 2017/04/06.
- 621 7. Shang Y, Griffith LC, Rosbash M. Light-arousal and circadian photoreception circuits intersect at the  
622 large PDF cells of the *Drosophila* brain. *Proceedings of the National Academy of Sciences of the United*  
623 *States of America*. 2008;105(50):19587-94.
- 624 8. Parisky KM, Agosto J, Pulver SR, Shang Y, Kuklin E, Hodge JJ, et al. PDF cells are a GABA-responsive  
625 wake-promoting component of the *Drosophila* sleep circuit. *Neuron*. 2008;60(4):672-82. Epub 2008/11/29.
- 626 9. Sheeba V, Fogle KJ, Kaneko M, Rashid S, Chou YT, Sharma VK, et al. Large ventral lateral neurons  
627 modulate arousal and sleep in *Drosophila*. *Current biology : CB*. 2008;18(20):1537-45.
- 628 10. Top D, Young MW. Coordination between Differentially Regulated Circadian Clocks Generates  
629 Rhythmic Behavior. *Cold Spring Harbor perspectives in biology*. 2018;10(7). Epub 2017/09/13.
- 630 11. Beckwith EJ, Ceriani MF. Communication between circadian clusters: The key to a plastic network.  
631 *FEBS letters*. 2015;589(22):3336-42. Epub 2015/08/25.
- 632 12. Allen CN, Nitabach MN, Colwell CS. Membrane Currents, Gene Expression, and Circadian Clocks.  
633 *Cold Spring Harbor perspectives in biology*. 2017;9(5). Epub 2017/03/02.
- 634 13. Ceriani MF, Hogenesch JB, Yanovsky M, Panda S, Straume M, Kay SA. Genome-wide expression  
635 analysis in *Drosophila* reveals genes controlling circadian behavior. *J Neurosci*. 2002;22(21):9305-19. Epub  
636 2002/11/06.

- 637 14. Fernandez MP, Chu J, Vilella A, Atkinson N, Kay SA, Ceriani MF. Impaired clock output by altered  
638 connectivity in the circadian network. *Proceedings of the National Academy of Sciences of the United States*  
639 *of America*. 2007;104(13):5650-5. Epub 2007/03/21.
- 640 15. Jaramillo AM, Zheng X, Zhou Y, Amado DA, Sheldon A, Sehgal A, et al. Pattern of distribution and  
641 cycling of SLOB, Slowpoke channel binding protein, in *Drosophila*. *BMC neuroscience*. 2004;5:3. Epub  
642 2004/03/10.
- 643 16. Tabuchi M, Monaco JD, Duan G, Bell B, Liu S, Liu Q, et al. Clock-Generated Temporal Codes  
644 Determine Synaptic Plasticity to Control Sleep. *Cell*. 2018;175(5):1213-27 e18. Epub 2018/10/16.
- 645 17. Nash HA, Scott RL, Lear BC, Allada R. An unusual cation channel mediates photic control of  
646 locomotion in *Drosophila*. *Current biology : CB*. 2002;12(24):2152-8. Epub 2002/12/25.
- 647 18. Lear BC, Lin JM, Keath JR, McGill JJ, Raman IM, Allada R. The ion channel narrow abdomen is critical  
648 for neural output of the *Drosophila* circadian pacemaker. *Neuron*. 2005;48(6):965-76. Epub 2005/12/21.
- 649 19. Flourakis M, Kula-Eversole E, Hutchison AL, Han TH, Aranda K, Moose DL, et al. A Conserved Bicycle  
650 Model for Circadian Clock Control of Membrane Excitability. *Cell*. 2015;162(4):836-48. Epub 2015/08/16.
- 651 20. Hodge JJ, Stanewsky R. Function of the Shaw potassium channel within the *Drosophila* circadian  
652 clock. *PloS one*. 2008;3(5):e2274. Epub 2008/05/30.
- 653 21. Smith P, Buhl E, Tsaneva-Atanasova K, Hodge JLL. Shaw and Shal voltage-gated potassium channels  
654 mediate circadian changes in *Drosophila* clock neuron excitability. *The Journal of physiology*.  
655 2019;597(23):5707-22. Epub 2019/10/16.
- 656 22. Ruben M, Drapeau MD, Mizrak D, Blau J. A mechanism for circadian control of pacemaker neuron  
657 excitability. *Journal of biological rhythms*. 2012;27(5):353-64.
- 658 23. Lee Y, Montell C. *Drosophila* TRPA1 functions in temperature control of circadian rhythm in  
659 pacemaker neurons. *J Neurosci*. 2013;33(16):6716-25. Epub 2013/04/19.
- 660 24. Fogle KJ, Baik LS, Houl JH, Tran TT, Roberts L, Dahm NA, et al. CRYPTOCHROME-mediated  
661 phototransduction by modulation of the potassium ion channel beta-subunit redox sensor. *Proceedings of*  
662 *the National Academy of Sciences of the United States of America*. 2015;112(7):2245-50. Epub 2015/02/04.
- 663 25. Feng G, Zhang J, Li M, Shao L, Yang L, Song Q, et al. Control of Sleep Onset by Shal/Kv4 Channels in  
664 *Drosophila* Circadian Neurons. *J Neurosci*. 2018;38(42):9059-71. Epub 2018/09/07.
- 665 26. Luthi A, McCormick DA. H-current: properties of a neuronal and network pacemaker. *Neuron*.  
666 1998;21(1):9-12. Epub 1998/08/11.
- 667 27. Sheeba V, Gu H, Sharma VK, O'Dowd DK, Holmes TC. Circadian- and light-dependent regulation of  
668 resting membrane potential and spontaneous action potential firing of *Drosophila* circadian pacemaker  
669 neurons. *Journal of neurophysiology*. 2008;99(2):976-88. Epub 2007/12/14.
- 670 28. Cao G, Nitabach MN. Circadian control of membrane excitability in *Drosophila melanogaster* lateral  
671 ventral clock neurons. *J Neurosci*. 2008;28(25):6493-501. Epub 2008/06/20.
- 672 29. Muraro NI, Ceriani MF. Acetylcholine from Visual Circuits Modulates the Activity of Arousal  
673 Neurons in *Drosophila*. *J Neurosci*. 2015;35(50):16315-27. Epub 2015/12/18.
- 674 30. Osterwalder T, Yoon KS, White BH, Keshishian H. A conditional tissue-specific transgene expression  
675 system using inducible GAL4. *Proceedings of the National Academy of Sciences of the United States of*  
676 *America*. 2001;98(22):12596-601. Epub 2001/10/25.
- 677 31. Depetris-Chauvin A, Berni J, Aranovich EJ, Muraro NI, Beckwith EJ, Ceriani MF. Adult-specific  
678 electrical silencing of pacemaker neurons uncouples molecular clock from circadian outputs. *Current biology*  
679 *: CB*. 2011;21(21):1783-93.
- 680 32. Chen Z, Wang Z. Functional study of hyperpolarization activated channel (Ih) in *Drosophila*  
681 behavior. *Science China Life sciences*. 2012;55(1):2-7. Epub 2012/02/09.
- 682 33. Hu W, Wang T, Wang X, Han J. Ih channels control feedback regulation from amacrine cells to  
683 photoreceptors. *PLoS biology*. 2015;13(4):e1002115. Epub 2015/04/02.
- 684 34. van den Pol AN. Neuropeptide transmission in brain circuits. *Neuron*. 2012;76(1):98-115. Epub  
685 2012/10/09.
- 686 35. Nusbaum MP, Blitz DM, Marder E. Functional consequences of neuropeptide and small-molecule  
687 co-transmission. *Nature reviews Neuroscience*. 2017;18(7):389-403. Epub 2017/06/09.
- 688 36. Helfrich-Forster C. The period clock gene is expressed in central nervous system neurons which also  
689 produce a neuropeptide that reveals the projections of circadian pacemaker cells within the brain of

- 690 *Drosophila melanogaster*. Proceedings of the National Academy of Sciences of the United States of America.  
691 1995;92(2):612-6. Epub 1995/01/17.
- 692 37. Li MT, Cao LH, Xiao N, Tang M, Deng B, Yang T, et al. Hub-organized parallel circuits of central  
693 circadian pacemaker neurons for visual photoentrainment in *Drosophila*. Nature communications.  
694 2018;9(1):4247. Epub 2018/10/14.
- 695 38. Schlichting M, Menegazzi P, Lelito KR, Yao Z, Buhl E, Dalla Benetta E, et al. A Neural Network  
696 Underlying Circadian Entrainment and Photoperiodic Adjustment of Sleep and Activity in *Drosophila*. J  
697 Neurosci. 2016;36(35):9084-96. Epub 2016/09/02.
- 698 39. Stoleru D, Peng Y, Agosto J, Rosbash M. Coupled oscillators control morning and evening locomotor  
699 behaviour of *Drosophila*. Nature. 2004;431(7010):862-8. Epub 2004/10/16.
- 700 40. Grima B, Chelot E, Xia R, Rouyer F. Morning and evening peaks of activity rely on different clock  
701 neurons of the *Drosophila* brain. Nature. 2004;431(7010):869-73. Epub 2004/10/16.
- 702 41. Yao Z, Shafer OT. The *Drosophila* circadian clock is a variably coupled network of multiple  
703 peptidergic units. Science. 2014;343(6178):1516-20. Epub 2014/03/29.
- 704 42. Park JH, Helfrich-Forster C, Lee G, Liu L, Rosbash M, Hall JC. Differential regulation of circadian  
705 pacemaker output by separate clock genes in *Drosophila*. Proceedings of the National Academy of Sciences  
706 of the United States of America. 2000;97(7):3608-13. Epub 2000/03/22.
- 707 43. Fernandez MP, Berni J, Ceriani MF. Circadian remodeling of neuronal circuits involved in rhythmic  
708 behavior. PLoS biology. 2008;6(3):e69. Epub 2008/03/28.
- 709 44. Gorostiza EA, Depetris-Chauvin A, Frenkel L, Pirez N, Ceriani MF. Circadian Pacemaker Neurons  
710 Change Synaptic Contacts across the Day. Current biology : CB. 2014. Epub 2014/08/27.
- 711 45. Sivachenko A, Li Y, Abruzzi KC, Rosbash M. The transcription factor Mef2 links the *Drosophila* core  
712 clock to Fas2, neuronal morphology, and circadian behavior. Neuron. 2013;79(2):281-92. Epub 2013/07/31.
- 713 46. Petsakou A, Sapsis TP, Blau J. Circadian Rhythms in Rho1 Activity Regulate Neuronal Plasticity and  
714 Network Hierarchy. Cell. 2015;162(4):823-35. Epub 2015/08/04.
- 715 47. Depetris-Chauvin A, Fernandez-Gamba A, Gorostiza EA, Herrero A, Castano EM, Ceriani MF. Mmp1  
716 processing of the PDF neuropeptide regulates circadian structural plasticity of pacemaker neurons. PLoS  
717 genetics. 2014;10(10):e1004700. Epub 2014/10/31.
- 718 48. McGuire SE, Mao Z, Davis RL. Spatiotemporal gene expression targeting with the TARGET and gene-  
719 switch systems in *Drosophila*. Science's STKE : signal transduction knowledge environment.  
720 2004;2004(220):pl6. Epub 2004/02/19.
- 721 49. Chen J, Reiher W, Hermann-Luibl C, Sellami A, Cognigni P, Kondo S, et al. Allatostatin A Signalling in  
722 *Drosophila* Regulates Feeding and Sleep and Is Modulated by PDF. PLoS genetics. 2016;12(9):e1006346.  
723 Epub 2016/10/01.
- 724 50. Guo F, Yu J, Jung HJ, Abruzzi KC, Luo W, Griffith LC, et al. Circadian neuron feedback controls the  
725 *Drosophila* sleep-activity profile. Nature. 2016;536(7616):292-7. Epub 2016/08/02.
- 726 51. Helfrich-Forster C, Shafer OT, Wulbeck C, Grieshaber E, Rieger D, Taghert P. Development and  
727 morphology of the clock-gene-expressing lateral neurons of *Drosophila melanogaster*. The Journal of  
728 comparative neurology. 2007;500(1):47-70. Epub 2006/11/14.
- 729 52. Noma A, Irisawa H. Membrane currents in the rabbit sinoatrial node cell as studied by the double  
730 microelectrode method. Pflugers Archiv : European journal of physiology. 1976;364(1):45-52. Epub  
731 1976/06/29.
- 732 53. He C, Chen F, Li B, Hu Z. Neurophysiology of HCN channels: from cellular functions to multiple  
733 regulations. Progress in neurobiology. 2014;112:1-23. Epub 2013/11/05.
- 734 54. Marx T, Gisselmann G, Stortkuhl KF, Hovemann BT, Hatt H. Molecular cloning of a putative voltage-  
735 and cyclic nucleotide-gated ion channel present in the antennae and eyes of *Drosophila melanogaster*.  
736 Invertebrate neuroscience : IN. 1999;4(1):55-63. Epub 2002/12/20.
- 737 55. Gisselmann G, Gamerschlag B, Sonnenfeld R, Marx T, Neuhaus EM, Wetzel CH, et al. Variants of the  
738 *Drosophila melanogaster* Ih-channel are generated by different splicing. Insect biochemistry and molecular  
739 biology. 2005;35(5):505-14. Epub 2005/04/05.
- 740 56. Jackson HA, Marshall CR, Accili EA. Evolution and structural diversification of hyperpolarization-  
741 activated cyclic nucleotide-gated channel genes. Physiological genomics. 2007;29(3):231-45. Epub  
742 2007/01/18.

- 743 57. Ishii TM, Nakashima N, Takatsuka K, Ohmori H. Peripheral N- and C-terminal domains determine  
744 deactivation kinetics of HCN channels. *Biochemical and biophysical research communications*.  
745 2007;359(3):592-8. Epub 2007/06/06.
- 746 58. Hegle AP, Frank CA, Berndt A, Klose M, Allan DW, Accili EA. The Ih Channel Gene Promotes Synaptic  
747 Transmission and Coordinated Movement in *Drosophila melanogaster*. *Frontiers in molecular neuroscience*.  
748 2017;10:41. Epub 2017/03/14.
- 749 59. Gonzalo-Gomez A, Turiegano E, Leon Y, Molina I, Torroja L, Canal I. Ih current is necessary to  
750 maintain normal dopamine fluctuations and sleep consolidation in *Drosophila*. *PloS one*. 2012;7(5):e36477.  
751 Epub 2012/05/11.
- 752 60. Allebrandt KV, Teder-Laving M, Cusumano P, Frishman G, Levandovski R, Ruepp A, et al. Identifying  
753 pathways modulating sleep duration: from genomics to transcriptomics. *Scientific reports*. 2017;7(1):4555.  
754 Epub 2017/07/06.
- 755 61. Colwell CS. Linking neural activity and molecular oscillations in the SCN. *Nature reviews*  
756 *Neuroscience*. 2011;12(10):553-69.
- 757 62. Notomi T, Shigemoto R. Immunohistochemical localization of Ih channel subunits, HCN1-4, in the  
758 rat brain. *The Journal of comparative neurology*. 2004;471(3):241-76. Epub 2004/03/03.
- 759 63. de Jeu MT, Pennartz CM. Functional characterization of the H-current in SCN neurons in subjective  
760 day and night: a whole-cell patch-clamp study in acutely prepared brain slices. *Brain research*.  
761 1997;767(1):72-80. Epub 1997/08/29.
- 762 64. O'Neill JS, Maywood ES, Chesham JE, Takahashi JS, Hastings MH. cAMP-dependent signaling as a  
763 core component of the mammalian circadian pacemaker. *Science*. 2008;320(5878):949-53. Epub  
764 2008/05/20.
- 765 65. Atkinson SE, Maywood ES, Chesham JE, Wozny C, Colwell CS, Hastings MH, et al. Cyclic AMP  
766 signaling control of action potential firing rate and molecular circadian pacemaking in the suprachiasmatic  
767 nucleus. *Journal of biological rhythms*. 2011;26(3):210-20. Epub 2011/06/02.
- 768 66. Duvall LB, Taghert PH. E and M circadian pacemaker neurons use different PDF receptor  
769 signalosome components in *drosophila*. *Journal of biological rhythms*. 2013;28(4):239-48. Epub 2013/08/10.
- 770 67. Sabado V, Vienne L, Nunes JM, Rosbash M, Nagoshi E. Fluorescence circadian imaging reveals a  
771 PDF-dependent transcriptional regulation of the *Drosophila* molecular clock. *Scientific reports*.  
772 2017;7:41560. Epub 2017/01/31.
- 773 68. Seluzicki A, Flourakis M, Kula-Eversole E, Zhang L, Kilman V, Allada R. Dual PDF signaling pathways  
774 reset clocks via TIMELESS and acutely excite target neurons to control circadian behavior. *PLoS biology*.  
775 2014;12(3):e1001810. Epub 2014/03/20.
- 776 69. Yamada R, Kuba H, Ishii TM, Ohmori H. Hyperpolarization-activated cyclic nucleotide-gated cation  
777 channels regulate auditory coincidence detection in nucleus laminaris of the chick. *J Neurosci*.  
778 2005;25(39):8867-77. Epub 2005/09/30.
- 779 70. Pavlov I, Scimemi A, Savtchenko L, Kullmann DM, Walker MC. I(h)-mediated depolarization  
780 enhances the temporal precision of neuronal integration. *Nature communications*. 2011;2:199. Epub  
781 2011/02/18.
- 782 71. Baumann VJ, Lehnert S, Leibold C, Koch U. Tonotopic organization of the hyperpolarization-  
783 activated current (Ih) in the mammalian medial superior olive. *Frontiers in neural circuits*. 2013;7:117. Epub  
784 2013/07/23.
- 785 72. Sun QQ, Prince DA, Huguenard JR. Vasoactive intestinal polypeptide and pituitary adenylate  
786 cyclase-activating polypeptide activate hyperpolarization-activated cationic current and depolarize  
787 thalamocortical neurons in vitro. *J Neurosci*. 2003;23(7):2751-8. Epub 2003/04/10.
- 788 73. Abruzzi KC, Rodriguez J, Menet JS, Desrochers J, Zadina A, Luo W, et al. *Drosophila* CLOCK target  
789 gene characterization: implications for circadian tissue-specific gene expression. *Genes & development*.  
790 2011;25(22):2374-86. Epub 2011/11/17.
- 791 74. DiFrancesco JC, DiFrancesco D. Dysfunctional HCN ion channels in neurological diseases. *Frontiers*  
792 *in cellular neuroscience*. 2015;6:174. Epub 2015/03/26.
- 793 75. Brennan GP, Baram TZ, Poolos NP. Hyperpolarization-Activated Cyclic Nucleotide-Gated (HCN)  
794 Channels in Epilepsy. *Cold Spring Harbor perspectives in medicine*. 2016;6(3):a022384. Epub 2016/03/05.

- 795 76. Ku SM, Han MH. HCN Channel Targets for Novel Antidepressant Treatment. *Neurotherapeutics : the*  
796 *journal of the American Society for Experimental NeuroTherapeutics*. 2017;14(3):698-715. Epub  
797 2017/06/01.
- 798 77. McGuire SE, Roman G, Davis RL. Gene expression systems in *Drosophila*: a synthesis of time and  
799 space. *Trends in genetics : TIG*. 2004;20(8):384-91. Epub 2004/07/21.
- 800 78. Hendricks JC, Finn SM, Panckeri KA, Chavkin J, Williams JA, Sehgal A, et al. Rest in *Drosophila* is a  
801 sleep-like state. *Neuron*. 2000;25(1):129-38. Epub 2000/03/09.
- 802 79. Shaw PJ, Cirelli C, Greenspan RJ, Tononi G. Correlates of sleep and waking in *Drosophila*  
803 *melanogaster*. *Science*. 2000;287(5459):1834-7. Epub 2000/03/10.
- 804 80. Geissmann Q, Garcia Rodriguez L, Beckwith EJ, Gilestro GF. Rethomics: An R framework to analyse  
805 high-throughput behavioural data. *PLoS one*. 2019;14(1):e0209331. Epub 2019/01/17.
- 806 81. Dietzl G, Chen D, Schnorrer F, Su KC, Barinova Y, Fellner M, et al. A genome-wide transgenic RNAi  
807 library for conditional gene inactivation in *Drosophila*. *Nature*. 2007;448(7150):151-6. Epub 2007/07/13.
- 808 82. Lin WH, Baines RA. Regulation of membrane excitability: a convergence on voltage-gated sodium  
809 conductance. *Molecular neurobiology*. 2015;51(1):57-67. Epub 2014/03/29.



| Gene Symbol          | CG      | RNAi info                   | Channel type                         | tau (h)                             | Rhythm. (%)   | n  | N |
|----------------------|---------|-----------------------------|--------------------------------------|-------------------------------------|---------------|----|---|
| <i>cac</i>           | CG1522  | DRSC 27244 + VDRC KK 104168 | VG Ca <sup>++</sup> channel          | <b>24.48±0.21*</b>                  | <b>57±11*</b> | 75 | 5 |
| <i>Ca-α1T</i>        | CG15899 | VDRC KK 108827              | VG Ca <sup>++</sup> channel          | <b>24.85±0.14*</b>                  | <b>30±9*</b>  | 70 | 3 |
| <i>CIC-a</i>         | CG31116 | VDRC KK 110394              | VG Cl <sup>-</sup> channel           | <b>21.78±0.13* &amp; 24.25±0.20</b> | <b>4±4*</b>   | 37 | 2 |
| <i>CngA</i>          | CG42701 | DRSC 26014 + VDRC KK 101745 | Cyclic-nucleotide G channel          | 23.55±0.06                          | <b>65±2*</b>  | 27 | 2 |
| <i>I<sub>h</sub></i> | CG8585  | DRSC 29574 + VDRC KK 110274 | VG cation channel                    | 23.95±0.03                          | <b>74±8*</b>  | 40 | 3 |
| <i>Ork1</i>          | CG1615  | DRSC 25885 + VDRC KK 104883 | K <sup>+</sup> leak channel          | <b>25.00±0.46*</b>                  | <b>48±12*</b> | 33 | 3 |
| <i>Shal</i>          | CG9262  | NIG 9262R-3                 | VG K <sup>+</sup> channel            | <b>24.59±0.11*</b>                  | 89±6          | 59 | 4 |
| <i>tipE</i>          | CG1232  | NIG 1232R-3                 | VG Na <sup>+</sup> auxiliary subunit | <b>25.73±0.40*</b>                  | 85±12         | 46 | 3 |
| <i>tipE</i>          | CG1232  | DRSC 26249                  | VG Na <sup>+</sup> auxiliary subunit | <b>25.60±0.38*</b>                  | <b>48±16*</b> | 47 | 3 |

**Table 1: Positive hits of the ion channel downregulation behavioral screen.**

This table includes a list of genes that, when downregulated exclusively in LNvs using these particular RNAi constructs, produced statistically significant alterations in free running period and/or percentage of rhythmicity. Values represent the average of mean values of N independent experiments ± SEM. n indicates total number of individuals tested. \*Indicates statistically significant difference (p<0.05) after a one-way ANOVA comparing *pdf,dicer*>RNAi to control genotypes *pdf,dicer*/+ (average period 24.00±0.07h and average rhythmicity 95±3%) and RNAi/+ (average period 24.08±0.17h and average rhythmicity 93±4%). Tukey test was used for means comparison and Levene's test for checking ANOVA assumption of homogeneity of variance. In the case where information for two RNAi constructs is given, it means that each RNAi on its own did not show significant differences compared to controls, but did show a trend towards an altered phenotype. For that reason two different RNAis for the same gene were genetically combined to achieve added downregulation strength. In the case of *CIC-a*, the reduction of rhythmicity was due to the appearance of complex rhythms and not to the deconsolidation of locomotor activity organization; the tau of each component of complex rhythms is given. V: Voltage, G: Gated, DRSC: *Drosophila* RNAi Screening Center, VDRC: Vienna *Drosophila* Resource Center, NIG: National Institute of Genetics.

| Genotype                                              | DD Analysis |               |     |   | LD Analysis       |                   |    |   |
|-------------------------------------------------------|-------------|---------------|-----|---|-------------------|-------------------|----|---|
|                                                       | tau (h)     | Rhythm.(%)    | n   | N | MAI               | EAI               | n  | N |
| <i>pdf,dicer/+</i>                                    | 24.00±0.07  | 95±3          | 75  | 3 | 0.73±0.02         | 0.88±0.02         | 55 | 2 |
| <i>UAS-I<sub>h</sub><sup>RNAi</sup>/+</i>             | 23.71±0.02  | 92±6          | 39  |   | 0.77±0.03         | 0.80±0.03         | 21 |   |
| <i>pdf,dicer&gt;UAS-I<sub>h</sub><sup>RNAi</sup></i>  | 23.95±0.03  | <b>74±8*</b>  | 40  |   | 0.67±0.03         | 0.80±0.02         | 23 |   |
| <i>pdfGS/+ , RU</i>                                   | 24.59±0.41  | 97±2          | 64  | 3 | 0.64±0.01         | <b>0.66±0.02*</b> | 76 | 3 |
| <i>UAS-I<sub>h</sub><sup>RNAi</sup>/+ , RU</i>        | 23.75±0.06  | 100±0         | 41  |   | 0.72±0.02         | 0.58±0.01         | 50 |   |
| <i>pdfGS&gt;UAS-I<sub>h</sub><sup>RNAi</sup> , RU</i> | 24.81±0.75  | <b>57±12*</b> | 67  |   | <b>0.59±0.01*</b> | 0.60±0.01         | 74 |   |
| <i>control</i>                                        | 24.02±0.05  | 96±2          | 86  | 4 | 0.68±0.03         | 0.84±0.02         | 62 | 2 |
| <i>I<sub>h</sub><sup>f01485</sup>/+</i>               | 23.87±0.03  | 96±3          | 80  |   | 0.71±0.04         | 0.89±0.02         | 32 |   |
| <i>I<sub>h</sub><sup>f01485</sup></i>                 | 23.56±0.05  | <b>60±3*</b>  | 98  |   | 0.55±0.05         | <b>0.65±0.03*</b> | 34 |   |
| <i>I<sub>h</sub><sup>f03355</sup>/+</i>               | 23.86±0.05  | 99±1          | 96  |   | 0.73±0.03         | 0.92±0.02         | 30 |   |
| <i>I<sub>h</sub><sup>f03355</sup></i>                 | 23.88±0.08  | <b>39±12*</b> | 104 |   | <b>0.51±0.03*</b> | <b>0.67±0.03*</b> | 30 |   |

**Table 2: *I<sub>h</sub>* genetic manipulations disrupt circadian locomotor activity organization.**

DD Analysis (left): the average free running period and percentage of rhythmicity of populations of male flies of the indicated genotypes are shown. Values represent the average of N independent experiments ± SEM. n indicates total number of individuals tested. \*Indicates statistically significant difference (p<0.05) after a one-way ANOVA comparing experimental genotypes to genetic controls. *UAS-I<sub>h</sub><sup>RNAi</sup>* refers to the genetic combination of two *UAS-I<sub>h</sub><sup>RNAi</sup>* constructs: DRSC 29574 + VDRC KK 110274 mentioned in Table 1). In the case of the *I<sub>h</sub>* null mutants, *I<sub>h</sub><sup>f01485</sup>* and *I<sub>h</sub><sup>f03355</sup>*, homozygotes were compared to a *w<sup>1118</sup>* control and to heterozygotes (*I<sub>h</sub><sup>f03355</sup>* crossed by *w<sup>1118</sup>*). RU refers to the presence of the steroid RU486 (200 µg/ml), the activator of the GeneSwitch system, in the food media. LD Analysis (right): Morning Anticipation Index (MAI) and Evening Anticipation Index (EAI) were calculated for the same genotypes. \*Indicates statistically significant difference (p<0.05) after Kruskal-Wallis statistical analysis with Dunn's multiple comparisons test.

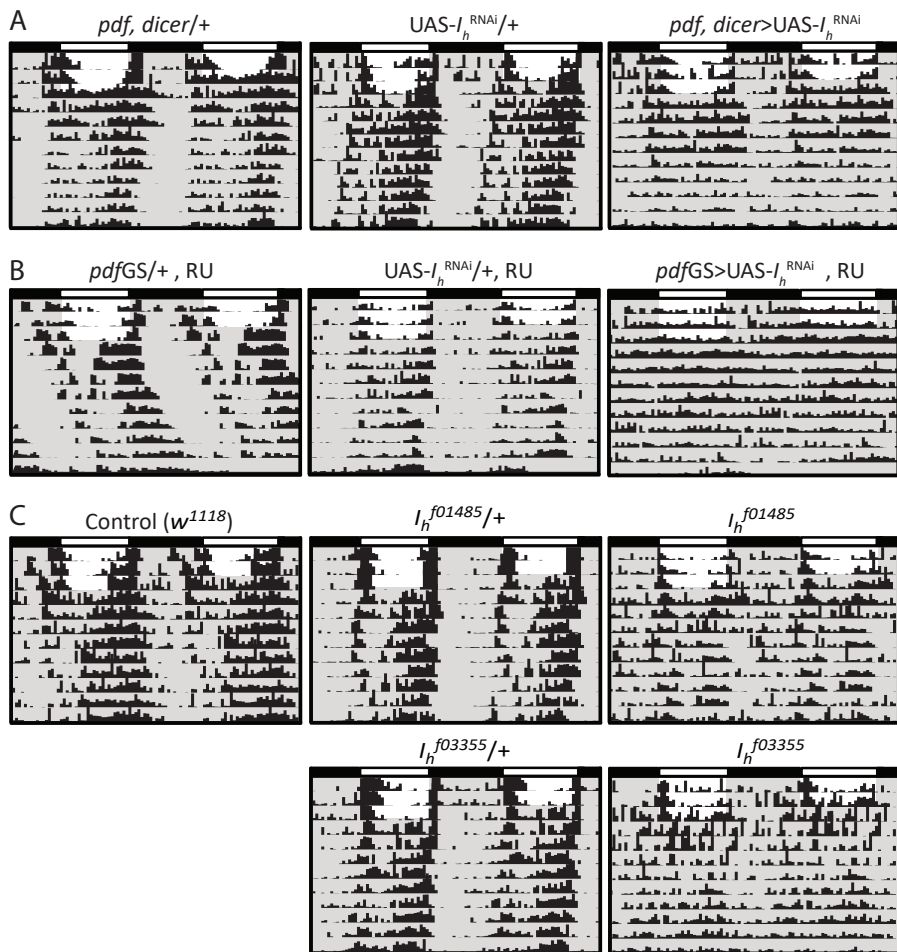

**Fig 1:  $I_h$  genetic manipulations disrupt circadian locomotor activity organization.**

Representative double-plotted actograms of the different  $I_h$  genetic manipulations tested. **A)** LNvs constitutive downregulation of  $I_h$  using *pdf,dicer* and *UAS-I<sub>h</sub><sup>RNAi</sup>* (in all cases *UAS-I<sub>h</sub><sup>RNAi</sup>* refers to the genetic combination of two *UAS-I<sub>h</sub><sup>RNAi</sup>* constructs: DRSC 29574 + VDRC KK 110274 mentioned in Table 1) and genetic controls. **B)** LNvs acute downregulation of  $I_h$  using *pdfGS* and *UAS-I<sub>h</sub><sup>RNAi</sup>* and genetic controls. RU refers to the presence of the steroid RU486, the activator of the GeneSwitch system, in the food media. **C)** Homozygote  $I_h$  null mutants,  $I_h^{f01485}$  and  $I_h^{f03355}$ , and controls ( $w^{1118}$  and heterozygote mutants, crossed by  $w^{1118}$ ). In the case of the experimental genotypes an actogram of an arrhythmic individual is shown, different genetic manipulations varied in the degree of arrhythmicity (see Table 2). No statistically significant alterations in free running period were found for these genetic manipulations.

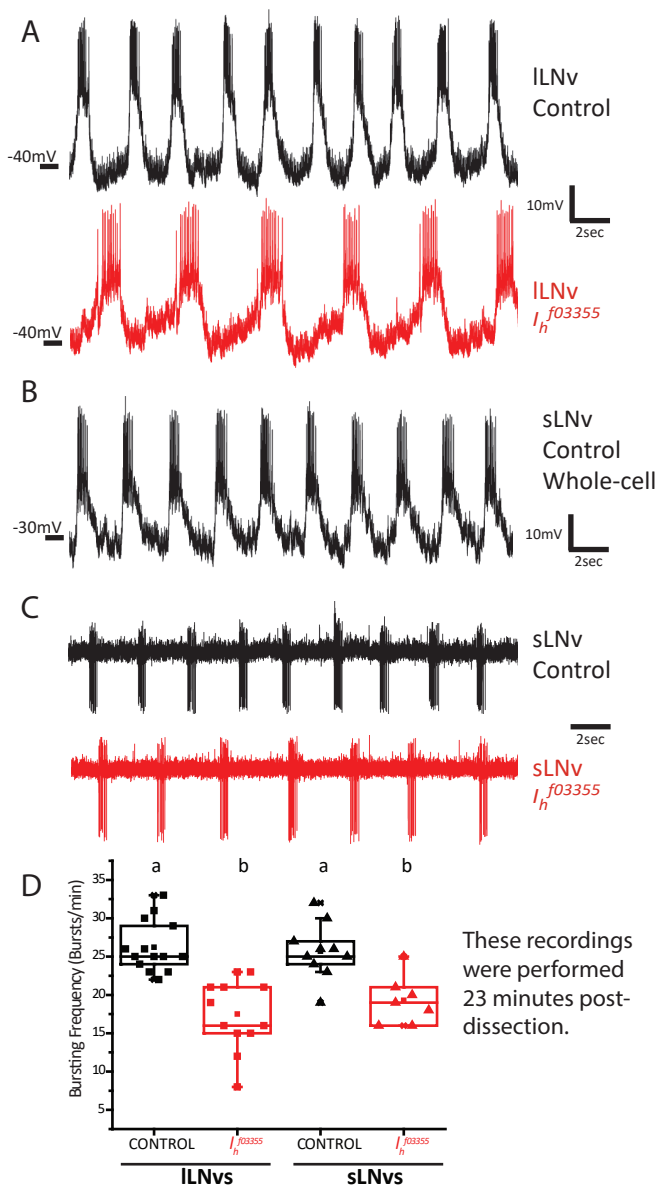

**Fig 2:  $I_h$  is important for high frequency bursting of ILNvs.**

**A)** Representative traces of whole-cell patch clamp recordings of ILNvs of control (*pdf*-RFP, top) and  $I_h$  homozygote mutant genotypes ( $I_h^{f03355}$ ; *pdf*-RFP, bottom). **B)** Representative trace of a recording of a sLNv control (*pdf*-RFP) in whole-cell patch clamp configuration. **C)** Representative traces of cell-attached recordings of sLNvs of control (*pdf*-RFP, top) and  $I_h$  homozygote mutant genotypes ( $I_h^{f03355}$ ; *pdf*-RFP, bottom). **D)** Box plot showing bursting frequency quantification of ILNvs and sLNvs of control (*pdf*-RFP) and  $I_h$  homozygote mutant genotypes ( $I_h^{f03355}$ ; *pdf*-RFP). All quantifications were done at exactly 23min post-dissection. Different letters indicate significant differences ( $p < 0.05$ ) after a one-way ANOVA with Tukey test for means comparisons. n: ILNvs<sub>CONTROL</sub> = 14, ILNvs<sub>Ih<sup>f03355</sup></sub> = 12, sLNvs<sub>CONTROL</sub> = 10, sLNvs<sub>Ih<sup>f03355</sup></sub> = 7.

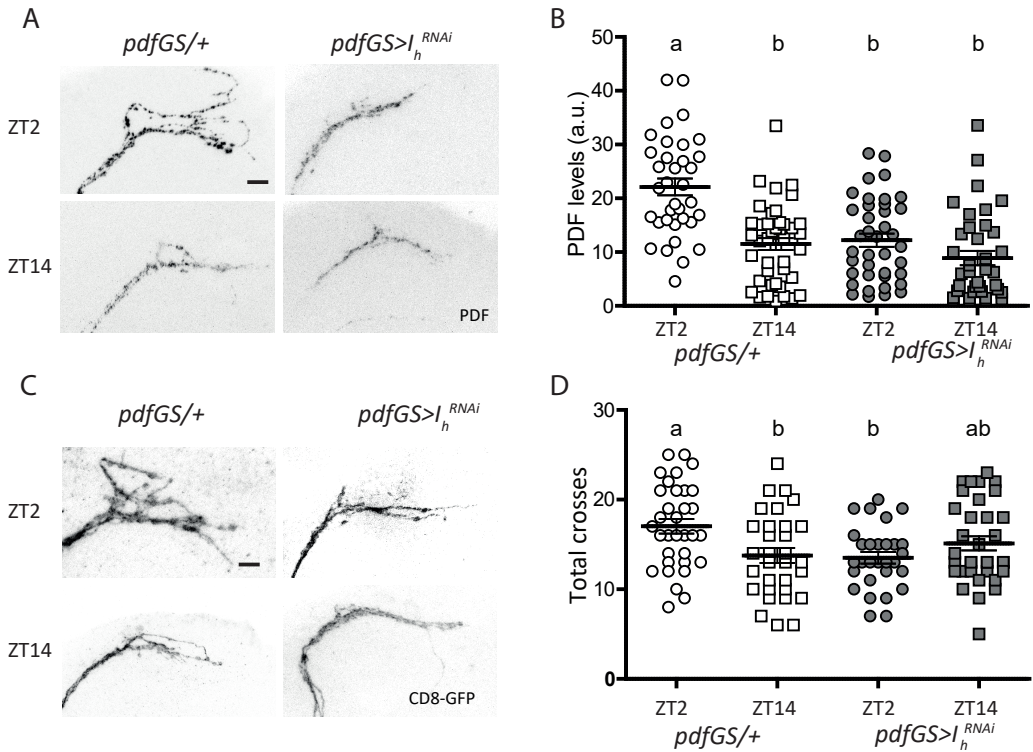

**Fig 3:  $I_h$  downregulation affects PDF levels and structural plasticity.**

**A)** Confocal images of representative sLNvs dorsal projections of individual flies of control (*pdfGS/+*) and  $I_h$  downregulation (*pdfGS>I<sub>h</sub><sup>RNAi</sup>*) at day (top) and night (bottom) showing their PDF content. Flies were kept in LD 12:12 at 25°C for 7 days in food containing RU486. Brains were dissected at ZT02 and ZT14 and standard anti-PDF immunofluorescence detection was performed. The bar indicates 10 $\mu$ m. **B)** PDF quantitation of the sLNvs dorsal projections for the four conditions mentioned before. Circles represent day time, squares, night time; empty symbols are the control genotype (*pdfGS/+*) and filled symbols, the experimental one (*pdfGS>I<sub>h</sub><sup>RNAi</sup>*). Different letters indicate significant differences, analysis included a two-way ANOVA (genotype and time of day) [ $F_{(3,150)}=18.58$   $p<0.0001$  with Tukey post hoc test,  $\alpha=0.05$ ,  $n=35-43$  per group. **C)** Confocal images of sLNvs projections illustrating their complexity at ZT02 and ZT14 for both in the control and  $I_h$  downregulated genotypes. Procedure as in A but with immunofluorescence against GFP. The bar indicates 10 $\mu$ m. **D)** Complexity quantitation was assessed by Sholl analysis (ImageJ) corroborated by visual inspection of each picture. Symbols as in B, analysis included a two-way ANOVA [ $F_{(3,123)}=4.24$   $p<0.01$  with Tukey post hoc test,  $\alpha=0.05$ ].  $n=34-38$  per group.

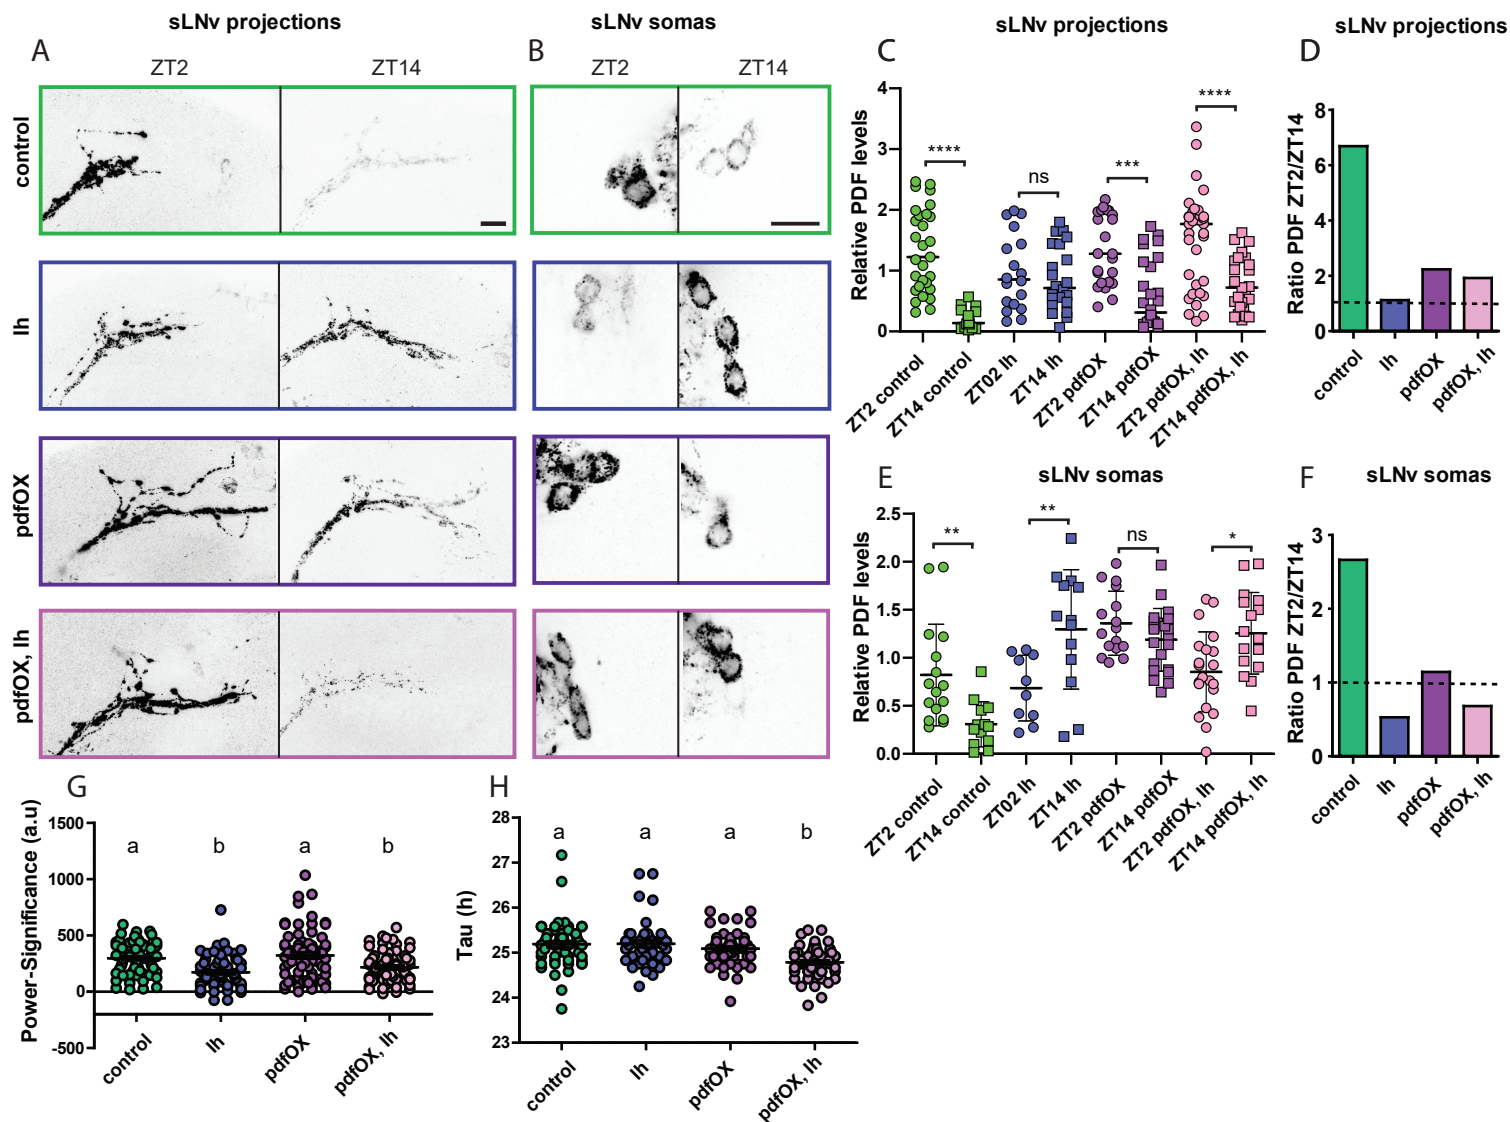

**Fig 4: PDF transport is affected upon  $I_h$  manipulation.**

**A, B**) Confocal images of representative sLNv projections (A) and somas (B) of individual flies of *pdfGS/+* (control), *pdfGS>I<sub>h</sub><sup>RNAi</sup>* (*I<sub>h</sub>*), *pdfGS>UAS-pdf* (*pdfOX*) and *pdfGS>UAS-pdf, I<sub>h</sub><sup>RNAi</sup>* (*pdfOX, I<sub>h</sub>*) at day (left) and night (right) showing their PDF content. Flies were kept in LD 12:12 at 25°C for 7 days in food containing RU486. Brains were dissected at ZT02 and ZT14 and standard anti-PDF immunofluorescence detection was performed, bars indicate 10µm. **C, E**) PDF quantitation of the sLNv dorsal projections (C) or somas (E) for the four genotypes mentioned before. Circles represent day time, squares, night time; each color is a different genotype. Asterisks represent significant statistical differences. For the projections, a non-parametric ANOVA Kruskal-Wallis test and Dunn's comparisons test showed differences among the two time points in control, *pdfOX* and *pdfOX, I<sub>h</sub>* groups but not in *I<sub>h</sub>* group [Kruskal-Wallis statistic (8,196)=71.95,  $p < 0.0001$ ,  $n = 18-28$ ]. Immunoreactivity from somas was analyzed with one-way ANOVA and Sidak's multiple comparisons test and revealed differences between the two time-points in every genotype except *pdfOX*, although *I<sub>h</sub>* and *pdfOX, I<sub>h</sub>* showed differences in the anti-phase direction compared to the control, ANOVA  $F(7, 120) = 10.95$ ,  $p < 0.0001$ ,  $n = 10-22$  (each point is the average of 3-4 cell somas for one hemi-brain of an individual fly). **D, F**) Morning to evening PDF level ratios for axonal projections (D) or somas (F). **G**) Locomotor behavior under constant darkness of the same genotypes as before. Experiments were performed as in Fig 1 and Table 2. The rhythmicity measured as power-significance was analyzed by Kruskal-Wallis test followed by Dunn's comparisons test and showed a significant reduction of power-significance in *I<sub>h</sub>* and *pdfOX, I<sub>h</sub>* compared to control and *pdfOX* as indicated by different letters [Kruskal-Wallis statistic (4,31)=31.40,  $p < 0.0001$ ,  $n = 65-72$ ]. **H**) Free running period values were analyzed as well. The same type of analysis reveals a reduction of tau in *pdfOX, I<sub>h</sub>* compared to all the other genotypes as indicated by a different letter [Kruskal-Wallis statistic (4,31)=38.28,  $p < 0.0001$ ,  $n = 45-58$ ].

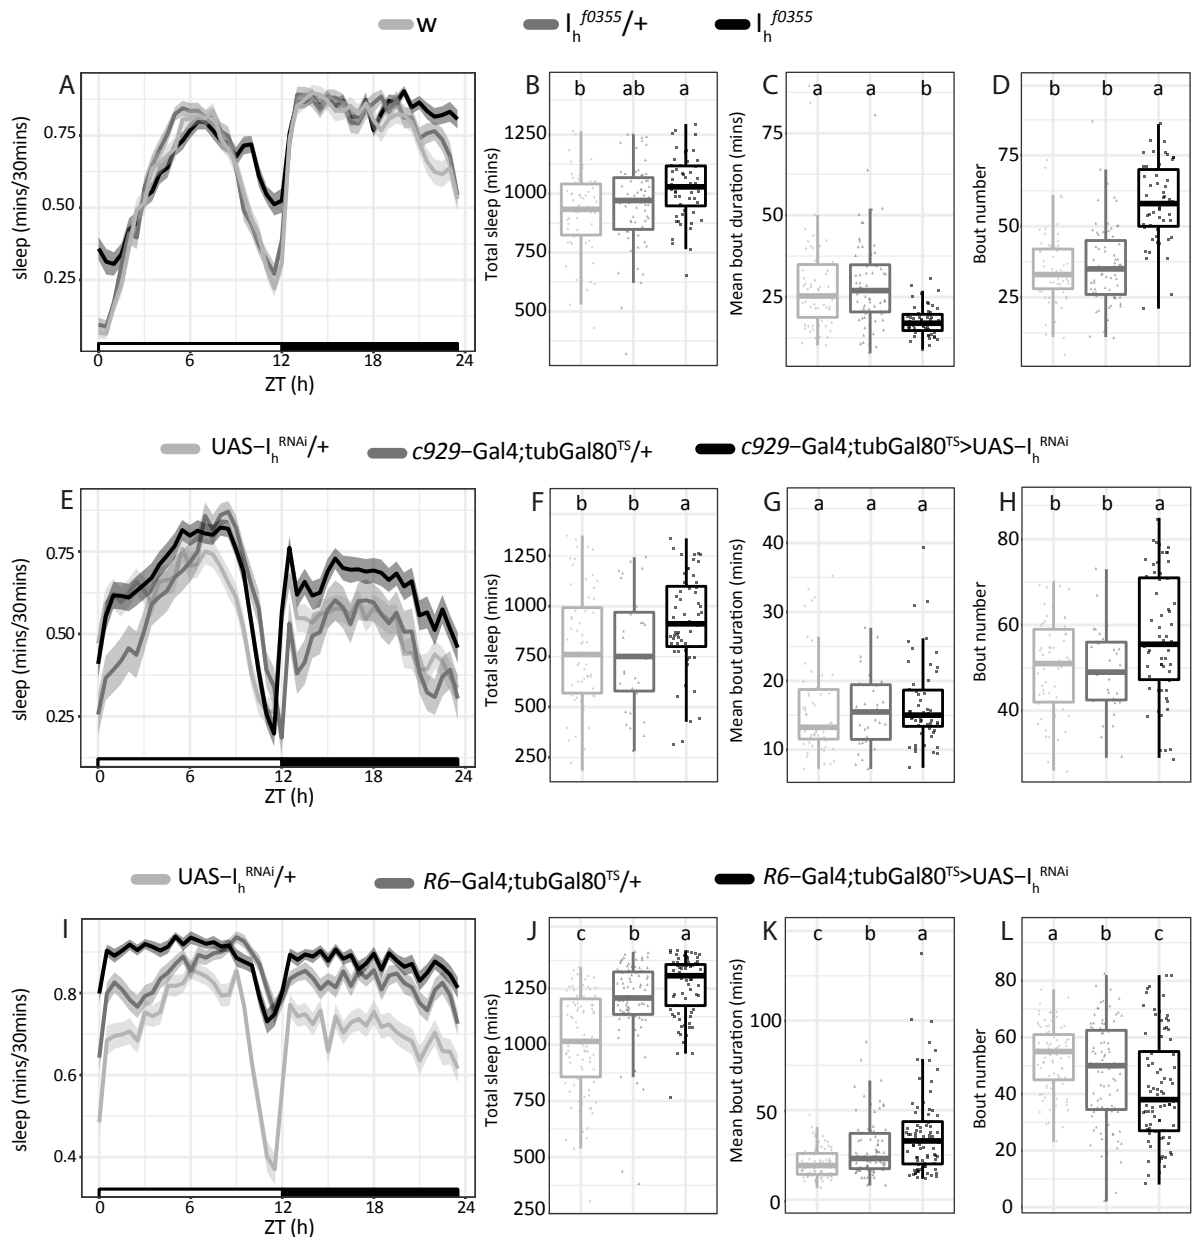

**Fig 5: Genetic manipulations of  $I_h$  increase sleep.**

**A, E, I)** Sleep ethograms for the indicated genotypes, quantification of the relative amount of sleep every 30 minutes as a function of the time of the day (starting at zeitgeber time = 0, when lights are turned on) and its standard deviation (shadowed area). Black and white bars at the bottom represent daytime (white) and nighttime (black). **B, F, J)** Boxplots showing the total amount of sleep minutes for each genotype. **C, G, K)** Boxplots showing the average duration of sleep episodes for each genotype. **D, H, L)** Boxplots showing the total amount of sleep episodes for each genotype. For all the boxplots, different letters indicate significant differences ( $p < 0.05$ ) after non parametric Kruskal-Wallis statistical analysis with multiple comparisons ( $p$  adjustment method= BH). For more information on sleep parameters see Table 3.

| Genotype                                                                               | Total Sleep (min)                | Daytime Sleep (min)             | Nighttime Sleep (min)           | Bout Duration (min)           | Sleep Bout number             | Latency lights on (min)       | Latency lights off (min)      | Activity Index                 | n  | N |
|----------------------------------------------------------------------------------------|----------------------------------|---------------------------------|---------------------------------|-------------------------------|-------------------------------|-------------------------------|-------------------------------|--------------------------------|----|---|
| <i>I<sub>h</sub><sup>f0355</sup></i>                                                   | <b>1026.6 ± 17.8<sup>a</sup></b> | 430.0 ± 14.3 <sup>a</sup>       | <b>599.9 ± 8.4<sup>a</sup></b>  | <b>17.6 ± 0.6<sup>b</sup></b> | <b>58.5 ± 1.8<sup>a</sup></b> | <b>25.0 ± 5.8<sup>b</sup></b> | <b>15.3 ± 1.9<sup>b</sup></b> | <b>4.24 ± 0.18<sup>a</sup></b> | 56 | 3 |
| <i>I<sub>h</sub><sup>f0355</sup>/+</i>                                                 | 956.9 ± 21.6 <sup>ab</sup>       | 394.6 ± 11.8 <sup>a</sup>       | 560.5 ± 15.0 <sup>ab</sup>      | 29.0 ± 1.6 <sup>a</sup>       | 36.4 ± 1.7 <sup>b</sup>       | 71.5 ± 6.3 <sup>a</sup>       | 27.1 ± 3.7 <sup>a</sup>       | 2.18 ± 0.08 <sup>b</sup>       | 69 |   |
| <i>w<sup>1118</sup></i>                                                                | 922.2 ± 20.8 <sup>b</sup>        | 380.5 ± 12.6 <sup>a</sup>       | 533.4 ± 17.4 <sup>b</sup>       | 28.4 ± 1.7 <sup>a</sup>       | 35.3 ± 1.6 <sup>b</sup>       | 78.7 ± 7.3 <sup>a</sup>       | 27.6 ± 3.0 <sup>a</sup>       | 2.02 ± 0.05 <sup>b</sup>       | 66 |   |
| <i>c929-Gal4;tub-Gal80<sup>TS</sup>&gt;UAS-I<sub>h</sub><sup>RNAi</sup></i>            | <b>921.7 ± 31.6<sup>a</sup></b>  | 464.1 ± 16.1 <sup>a</sup>       | <b>457.7 ± 21.6<sup>a</sup></b> | 17.0 ± 0.9 <sup>a</sup>       | <b>57.5 ± 1.9<sup>a</sup></b> | 18.1 ± 3.1 <sup>a</sup>       | 15.9 ± 2.7 <sup>b</sup>       | 2.16 ± 0.07 <sup>b</sup>       | 58 | 2 |
| <i>c929-Gal4;tub-Gal80<sup>TS</sup>/+</i>                                              | 773.0 ± 50.7 <sup>b</sup>        | 432.6 ± 25.5 <sup>a</sup>       | 340.4 ± 30.3 <sup>b</sup>       | 15.7 ± 0.9 <sup>a</sup>       | 49.4 ± 1.8 <sup>b</sup>       | 51.0 ± 12.0 <sup>a</sup>      | 45.7 ± 8.1 <sup>a</sup>       | 1.88 ± 0.05 <sup>c</sup>       | 31 |   |
| <i>UAS-I<sub>h</sub><sup>RNAi</sup>/+</i>                                              | 793.5 ± 38.1 <sup>b</sup>        | 424.8 ± 21.5 <sup>a</sup>       | 368.7 ± 21.1 <sup>b</sup>       | 16.0 ± 0.8 <sup>a</sup>       | 50.6 ± 1.4 <sup>b</sup>       | 25.5 ± 7.5 <sup>a</sup>       | 17.4 ± 2.9 <sup>b</sup>       | 2.52 ± 0.09 <sup>a</sup>       | 61 |   |
| <i>R6-Gal4;tub-Gal80<sup>TS</sup>&gt;UAS-I<sub>h</sub><sup>RNAi</sup></i>              | <b>1264.9 ± 14.2<sup>a</sup></b> | <b>636.7 ± 7.6<sup>a</sup></b>  | <b>630.7 ± 21.6<sup>a</sup></b> | <b>37.1 ± 2.5<sup>a</sup></b> | <b>41.7 ± 2.0<sup>c</sup></b> | <b>2.2 ± 0.7<sup>c</sup></b>  | 16.8 ± 3.7 <sup>b</sup>       | <b>2.63 ± 0.08<sup>a</sup></b> | 85 | 3 |
| <i>R6-Gal4;tub-Gal80<sup>TS</sup>/+</i>                                                | 1195.6 ± 19.6 <sup>b</sup>       | 605.9 ± 10.8 <sup>b</sup>       | 589.6 ± 30.3 <sup>b</sup>       | 31.2 ± 3.1 <sup>b</sup>       | 47.3 ± 1.9 <sup>b</sup>       | 5.4 ± 1.1 <sup>b</sup>        | 24.7 ± 6.2 <sup>b</sup>       | 2.16 ± 0.06 <sup>b</sup>       | 87 |   |
| <i>UAS-I<sub>h</sub><sup>RNAi</sup>/+</i>                                              | 1015.7 ± 23.7 <sup>c</sup>       | 515.0 ± 12.8 <sup>c</sup>       | 504.6 ± 21.1 <sup>c</sup>       | 20.5 ± 0.8 <sup>c</sup>       | 52.5 ± 1.2 <sup>a</sup>       | 13.6 ± 2.8 <sup>a</sup>       | 18.2 ± 2.4 <sup>a</sup>       | 2.21 ± 0.08 <sup>b</sup>       | 89 |   |
| <i>pdf-Gal4, UAS-dicer2;tub-Gal80<sup>TS</sup>&gt;UAS-I<sub>h</sub><sup>RNAi</sup></i> | <b>955.9 ± 27.8<sup>a</sup></b>  | 603.5 ± 12.3 <sup>ab</sup>      | <b>357.7 ± 20.5<sup>a</sup></b> | 25.8 ± 1.1 <sup>b</sup>       | 39.2 ± 1.6 <sup>a</sup>       | 17.2 ± 3.3 <sup>b</sup>       | <b>19.4 ± 4.6<sup>b</sup></b> | 1.82 ± 0.03 <sup>a</sup>       | 61 | 2 |
| <i>pdf-Gal4, UAS-dicer2;tub-Gal80<sup>TS</sup>/+</i>                                   | 847.9 ± 15.7 <sup>b</sup>        | 632.4 ± 7.4 <sup>a</sup>        | 215.5 ± 12.5 <sup>c</sup>       | 30.1 ± 1.0 <sup>a</sup>       | 30.0 ± 1.8 <sup>b</sup>       | 22.5 ± 1.7 <sup>a</sup>       | 36.5 ± 5.6 <sup>a</sup>       | 1.64 ± 0.03 <sup>b</sup>       | 63 |   |
| <i>UAS-I<sub>h</sub><sup>RNAi</sup>/+</i>                                              | 848.7 ± 20.0 <sup>b</sup>        | 573.1 ± 12.9 <sup>b</sup>       | 274.9 ± 15.6 <sup>b</sup>       | 22.4 ± 1.1 <sup>c</sup>       | 41.9 ± 1.7 <sup>a</sup>       | 14.8 ± 1.9 <sup>b</sup>       | 24.5 ± 3.8 <sup>a</sup>       | 1.81 ± 0.03 <sup>a</sup>       | 61 |   |
| <i>c929-Gal4&gt;UAS-I<sub>h</sub><sup>RNAi</sup></i>                                   | 980.5 ± 29.9 <sup>a</sup>        | <b>496.1 ± 15.0<sup>a</sup></b> | 484.1 ± 17.2 <sup>a</sup>       | 18.2 ± 1.3 <sup>a</sup>       | 60.3 ± 2.1 <sup>a</sup>       | <b>8.6 ± 2.4<sup>c</sup></b>  | 21.7 ± 2.6 <sup>b</sup>       | <b>1.98 ± 0.04<sup>a</sup></b> | 72 | 3 |
| <i>c929-Gal4/+</i>                                                                     | 793.1 ± 26.8 <sup>b</sup>        | 394.4 ± 13.5 <sup>c</sup>       | 401.4 ± 17.1 <sup>b</sup>       | 15.5 ± 0.9 <sup>a</sup>       | 52.7 ± 1.5 <sup>b</sup>       | 56.5 ± 7.7 <sup>a</sup>       | 32.3 ± 3.0 <sup>a</sup>       | 1.89 ± 0.03 <sup>ab</sup>      | 71 |   |
| <i>UAS-I<sub>h</sub><sup>RNAi</sup>/+</i>                                              | 919.0 ± 29.5 <sup>a</sup>        | 444.5 ± 15.9 <sup>b</sup>       | 474.9 ± 17.3 <sup>a</sup>       | 16.9 ± 1.1 <sup>a</sup>       | 58.7 ± 1.6 <sup>a</sup>       | 19.9 ± 4.0 <sup>b</sup>       | 26.5 ± 5.1 <sup>b</sup>       | 1.80 ± 0.03 <sup>b</sup>       | 70 |   |
| <i>R6-Gal4&gt;UAS-I<sub>h</sub><sup>RNAi</sup></i>                                     | <b>1111.7 ± 27.7<sup>a</sup></b> | <b>545.9 ± 15.7<sup>a</sup></b> | <b>551.2 ± 14.9<sup>a</sup></b> | <b>27.2 ± 0.6<sup>a</sup></b> | 53.3 ± 2.9 <sup>a</sup>       | <b>6.8 ± 2.6<sup>b</sup></b>  | 30.9 ± 7.2 <sup>a</sup>       | 2.21 ± 0.09 <sup>a</sup>       | 65 | 3 |
| <i>R6-Gal4/+</i>                                                                       | 854.5 ± 35.9 <sup>b</sup>        | 409.7 ± 18.0 <sup>b</sup>       | 440.9 ± 20.8 <sup>b</sup>       | 15.6 ± 1.2 <sup>b</sup>       | 58.2 ± 2.3 <sup>a</sup>       | 19.0 ± 3.0 <sup>a</sup>       | 26.6 ± 4.4 <sup>a</sup>       | 2.06 ± 0.03 <sup>a</sup>       | 71 |   |
| <i>UAS-I<sub>h</sub><sup>RNAi</sup>/+</i>                                              | 826.9 ± 28.1 <sup>b</sup>        | 400.6 ± 16.4 <sup>b</sup>       | 423.6 ± 15.5 <sup>b</sup>       | 14.1 ± 2.9 <sup>b</sup>       | 59.9 ± 1.4 <sup>a</sup>       | 32.9 ± 5.4 <sup>a</sup>       | 24.2 ± 2.5 <sup>a</sup>       | 1.81 ± 0.03 <sup>b</sup>       | 70 |   |
| <i>pdf-Gal4, UAS-dicer2&gt;UAS-I<sub>h</sub><sup>RNAi</sup></i>                        | 715.9 ± 37.8 <sup>b</sup>        | 330.6 ± 20.7 <sup>b</sup>       | 385.3 ± 21.6 <sup>b</sup>       | 14.3 ± 0.9 <sup>b</sup>       | 52.2 ± 1.9 <sup>a</sup>       | 27.5 ± 6.2 <sup>b</sup>       | 36.5 ± 6.2 <sup>a</sup>       | 1.75 ± 0.04 <sup>b</sup>       | 64 | 2 |
| <i>pdf-Gal4, UAS-dicer2/+</i>                                                          | 714.0 ± 29.3 <sup>b</sup>        | 320.8 ± 15.3 <sup>b</sup>       | 393.3 ± 18.3 <sup>b</sup>       | 14.0 ± 0.7 <sup>b</sup>       | 52.4 ± 1.6 <sup>a</sup>       | 70.0 ± 7.1 <sup>a</sup>       | 42.4 ± 6.3 <sup>a</sup>       | 1.73 ± 0.03 <sup>b</sup>       | 56 |   |
| <i>UAS-I<sub>h</sub><sup>RNAi</sup>/+</i>                                              | 937.5 ± 28.1 <sup>a</sup>        | 414.3 ± 18.4 <sup>a</sup>       | 525.5 ± 15.2 <sup>a</sup>       | 18.7 ± 0.9 <sup>a</sup>       | 52.6 ± 1.7 <sup>a</sup>       | 39.0 ± 6.5 <sup>b</sup>       | 21.3 ± 4.6 <sup>b</sup>       | 1.89 ± 0.03 <sup>a</sup>       | 64 |   |

**Table 3: Sleep parameters after genetic manipulation of *I<sub>h</sub>*.**

The following sleep parameters upon the different genetic manipulations presented in the first column are shown; total sleep, daytime sleep, nighttime sleep, sleep bout duration, bout amount, latency to lights on, latency to lights off, and activity index (defined as the average activity counts in the active minutes). Average ± SEM (Standard Error of the Mean) of N experiments using a final n number of individuals are displayed. Different letters indicate significant differences (p<0.05) after non parametric Kruskal-Wallis statistical analysis with multiple comparisons (p adjustment method=BH). Sleep parameters where the experimental genotype showed statistically significant differences compared to genetic controls are displayed in bold.



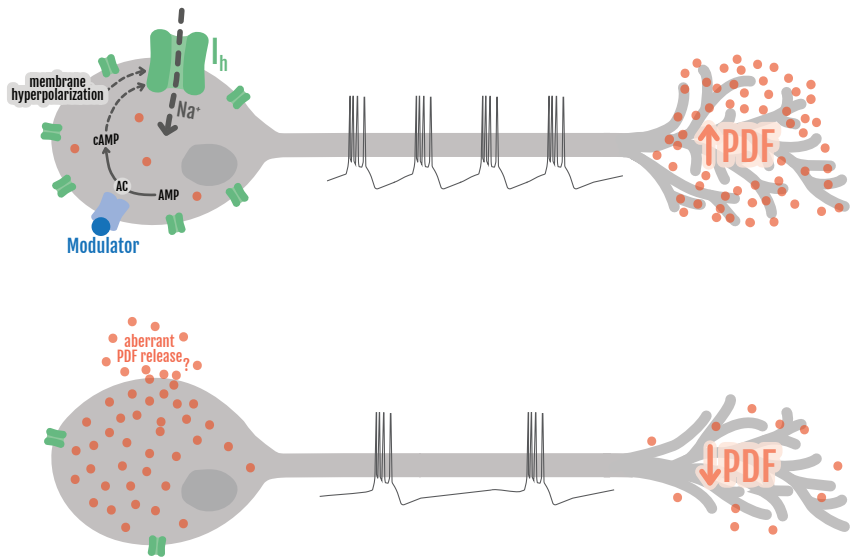

**Fig 6: Model summarizing the findings reported and the hypotheses raised by this work.**

$I_h$  channel (in green) responds to membrane hyperpolarization and is modulated by cyclic nucleotides, serving as coincidence detector for electrical and chemical signals mediated by ligands that activate G protein-coupled receptors (such as PDF, Dopamine or other neuropeptides, symbolized by "Modulator", in blue).  $I_h$  function is necessary to allow LNvs to fire action potentials in a high frequency bursting mode, which permits the release of PDF (in orange) at high levels and in a timely manner (top neuron). In the absence or upon  $I_h$  knock down (bottom neuron), bursting does not reach such high frequency and PDF levels at the axonal projections are reduced. Associated to the decreased bursting frequency, large quantities of PDF accumulate at the soma, likely due to a failure in dense core vesicle transport. This may give rise to a hypothetical aberrant PDF release from the overloaded soma, likely overriding the internal temporal control. All in all, these cellular disruptions result in anomalies at the behavioral level, such as disorganization of circadian locomotor activity and an increase in sleep. At the level of the axonal projections, the model represents an early daytime situation, where in control animals PDF levels are high and the axonal terminal are spread out. However, the accumulation and possible aberrant release of PDF from the soma is more likely to happen during the night (see Fig 4).
